1 **The genetics and genome-wide screening of regrowth loci, a key component of perennialism**  
2 **in *Zea diploperennis***

3 Anjun Ma<sup>1,\*</sup>, Yinjie Qiu<sup>1,†</sup>, Tajbir Raihan<sup>1</sup>, Bimal Paudel<sup>1</sup>, Subha Dahal<sup>1,‡</sup>, Yongbin Zhuang<sup>1,§</sup>,  
4 Aravid Galla<sup>1,¶</sup>, Donald Auger<sup>1</sup> & Yang Yen<sup>1,\*</sup>

5 **Author Affiliation:**

6 <sup>1</sup>Department of Biology and Microbiology, South Dakota State University, Brookings, SD  
7 57007, USA

8 \*: These authors made the equal contributions to this research

9 †: Current address: Department of Horticultural Science, University of Minnesota, St. Paul, MN  
10 55108, USA

11 ‡: Current address: Department of Molecular Genetics, University of Toronto, Toronto, ON M5S  
12 1A8, Canada;

13 §: Current address: College of Agronomy, Shandong Agricultural University, Taian, Shandong,  
14 271018, China

15 ¶: Current address: Department of Entomology, University of Arkansas, Fayetteville, AR 72701,  
16 USA

17 \* **Corresponding Author:** Dr. Yang Yen, SNP 249C, Box 2140D, Brookings, SD 57007, USA;  
18 +1-605-688-4567; [yang.yen@sdstate.edu](mailto:yang.yen@sdstate.edu)

19 **Classification:**

20 Major: Biological Science

21 Minor: Plant Biology

22 **Short Title:** Regrowth loci in *Zea diploperennis*

23 **Key Words:** Perennial maize, teosinte, *Zea mays*, corn, genetics, perenniality, GBS

24 This manuscript was previously deposited as a preprint at <http://dx.doi.org/10.1101/388256>.  
25

## 26 **Abstract**

27 Perennialism is common among the higher plants, yet little is known about its  
28 inheritance. To address this, six hybrids were made by reciprocally crossing perennial *Zea*  
29 *diploperennis* Iltis, Doebley & R. Guzman with inbred lines B73 and Mo17 and Rhee Flint, a  
30 heirloom variety, of *Z. mays* L. ssp. *mays*. All the F<sub>1</sub> plants demonstrated several cycles of  
31 growth, flowering, senescence and regrowth into normal flowering plants, indicating a dominant  
32 effect of the *Z. diploperennis* alleles. The regrowability (i.e. the plants' ability to regrow after  
33 senescence) was stably transmitted to progeny of the hybrids, so we focused on this trait.  
34 Segregation ratios in the F<sub>2</sub> generations are consistent with the trait controlled by two dominant,  
35 complementary loci, but do not exclude the influence of other modifiers or environment.  
36 Genome-wide screening with genotyping-by-sequencing (GBS) indicated two major regrowth  
37 loci, *regrowth 1* and *regrowth 2*, were on chromosomes 2 and 7, respectively. These findings lay  
38 the foundation for further exploration of the molecular mechanism of regrowth in *Z.*  
39 *diploperennis*.

40 **Significance Statement:** This study contributes to the general understanding of inheritance  
41 of perennialism in the higher plants. Previous genetic studies of the perennialism in *Zea* have  
42 yielded contradictory results. We take a reductionist approach by specifically focusing on one  
43 trait, the plant's ability to restart a new life cycle after senescence on the same body. While traits,  
44 such as rhizome formation, tillering and dormancy may be important to converting *Z. mays* to  
45 becoming truly perennial, understanding the conditions for regrowth after senescence will be  
46 substantial first step. Importantly, our data indicate that there is no major barrier to transferring

47 this trait into maize or other grass crops for perennial crop development with proper technology,  
48 which enhances sustainability of grain crop production in an environmentally friendly way.

## 49 **Introduction**

50 Perennialism is the phenomenon that a plant can live for more than two years; the ability  
51 of doing so is termed perenniality. Plants typically have a life cycle of growth, reproduction  
52 (sexual and/or vegetative) and senescence. Annuals and biennials have only one such cycle in  
53 their life, leaving behind seeds, bulbs, tubers, etc. to initiate another life cycle. Perennials  
54 maintain juvenile meristematic tissues capable of regrowth after senescence to start a new life  
55 cycle on the same body. How perennials do so remains as a mystery. Subterranean stems (such  
56 as rhizomes), polycarpy and tuberous roots are often cited as the means by which plants achieve  
57 perenniality. However, none of these traits is absolutely required by perennials. For instance,  
58 bamboos are essentially monocarpic perennial that regrow from rhizomes. Many perennial  
59 temperate grasses, such as switchgrass<sup>(1)</sup>, cordgrass<sup>(2)</sup> and eastern gamagrass<sup>(3)</sup>, regrow from the  
60 crowns instead of rhizomes. On the other hand, some annual/biennial plants, such as radish  
61 (*Raphanus sativus*), grow tuberous roots.

62 Although perennialism is common among higher plants, the study of its genetics and  
63 molecular biology is sporadic. So far, the only published research in molecular mechanism of  
64 plant perennialism was conducted in Arabidopsis. Melzer et al. successfully mutated this annual  
65 herb to show some perennial habits, such as increased woody fiber in the stem, by down-  
66 regulating two flowering genes coding for MADS-box proteins, SUPPRESSOR OF  
67 OVEREXPRESSION OF CONSTANT 1 and FRUITFUL<sup>(4)</sup>. Unfortunately, this woody mutant  
68 was sterile, and no follow-up research was reported. Perennial-related genes and quantitative loci  
69 (QTL) have been reported in other species. Major QTL controlling rhizome development,

70 regrowth and tiller number have been mapped on sorghum linkage groups C (chromosome 1)  
71 and D (chromosome 4)<sup>(5,6)</sup>, which are homoeologous to regions of maize chromosomes 1, 4, 5 and  
72 9, respectively<sup>(7)</sup>. Hu et al. mapped two dominant, complementary QTL *Rhz2* (*Rhizomatousness 2*)  
73 and *Rhz3* that control rhizome production on rice chromosomes 3 and 4 at the loci homoeologous  
74 to the sorghum QTL<sup>(8)</sup>. Tuberos roots in a wild perennial mungbean (*Vigna radiate* ssp.  
75 *sublobata*) are conditioned by two dominant, complementary genes<sup>(9)</sup>. However, after years of  
76 effort these perennialism-related genes have yet to be cloned from any of the species despite that  
77 mapping data and complete genomic sequences of rice and sorghum are readily available.  
78 Therefore, no further research has been reported about these perennialism-related loci/genes.  
79 Recently, Ryder and the associates reported a set of 98 expressed contigs in Johnsongrass (*S.*  
80 *halepense*) that are likely associated with rhizome development<sup>(9)</sup>.

81 In the genus *Zea* L., most species, including maize (*Z. mays* ssp. *mays*), are annual.  
82 However, two closely related species, tetraploid *Z. perennis* [Hitcch.] Reeves and Mangelsdorf  
83 and diploid *Z. diploperennis* Iltis, Doebley & R. Guzman, are perennial. Perenniality of these  
84 two teosintes is manifested as regrowth after seed production and senescence, which includes  
85 developing juvenile basal axillary buds and rhizomes, under favorable environment. A fertile F<sub>1</sub>  
86 hybrid between *Z. mays* and *Z. perennis* was made by Emerson<sup>(10)</sup> in the 1920s, and *Z. mays*'  
87 hybrids with *Z. diploperennis* were also obtained soon after the diploid perennial teosinte was  
88 discovered in the 1990s<sup>(11)</sup>. Evergreen stalks, bulbils (highly-condensed rhizomes), basal shoot  
89 development, stiff stalk and robust root system have all been cited as phenotypic features of  
90 perennialism in *Z. diploperennis*<sup>(12-14)</sup>. For example, evergreen stalks, which was proposed as a  
91 component of perennialism in *Z. diploperennis*<sup>(12)</sup>, appears to be linked to *sugary 1* on the short  
92 arm of chromosome 4<sup>(15)</sup>.

93           Conflicting conclusions have been reached in various studies on how perennialism is  
94 inherited in *Zea*. Shaver, who worked with tetraploid *Z. perennis*, proposed that a triple  
95 homozygous recessive genotype is needed for the perenniality in *Zea*<sup>(16)</sup>. In this model, *pe*  
96 (*perennialism*), interacting with *gt* (*grassy tillers*) and *id* (*indeterminate*), plays a key role in  
97 conferring totipotency to the basal axillary buds and rhizomes in the perennial teosintes<sup>(16,17)</sup>. The  
98 nature of *pe* remains unknown and the *Z. perennis*-derived genotype from which *pe* was  
99 identified by Shaver<sup>(16)</sup> was lost and never recovered despite decades of intensive efforts (Shaver,  
100 personal communication). Mangelsdorf and Dunn mapped *Pe\*-d*, the maize allele of the *pe*  
101 homologue in *Z. diploperennis*, to the long arm of maize chromosome 4<sup>(18)</sup>. The *gt* gene (aka *gt1*),  
102 located on the short arm of maize chromosome 1, encodes a class I homeodomain leucine zipper  
103 that promotes lateral bud dormancy and suppresses elongation of lateral ear branches<sup>(15)</sup>. It appears  
104 that *gt1* depends on the activity of a major maize domestication gene, *teosinte branched 1* (*tb1*),  
105 and is inducible by shading<sup>(19)</sup>. The *id* gene (aka *id1*) alters maize's ability to flower<sup>(20)</sup>. Both *tb1*  
106 and *id1* are located on the long arm of maize chromosome 1 and both encode transcription  
107 factors with zinc finger motifs<sup>(19,21)</sup>. Singleton believed that *id1* inhibits plantlet generation at the  
108 upper nodes of a maize stalk<sup>(20)</sup>. Mangelsdorf and the associates proposed that one or two  
109 dominant genes control annual growth habit in their *Z. diploperennis*-popcorn hybrid<sup>(22)</sup>.

110           In contrast to the recessive inheritance model, Galinat proposed that perennialism in *Z.*  
111 *diploperennis* is at least partially controlled by two dominant complementary genes<sup>(15)</sup>. Also, Ting  
112 and Yu obtained three perennial F<sub>1</sub> hybrids by pollinating three Chinese field corn varieties with  
113 *Z. diploperennis*<sup>(23)</sup>, which indicate that perennial factors are dominant. Unfortunately, there is no  
114 further report about these hybrids or their derivatives.

115           Westerbergh and Doebley regarded perennialism in *Z. diploperennis* as a quantitative

116 trait and identified a total of 38 QTL for eight perennial-habit traits from a *Z. diploperennis* x *Z.*  
117 *mays* ssp. *parviglumis* (annual) mapping population<sup>(12)</sup>. Intriguingly, they did not identify any  
118 QTL that shows a singularly large effect. Murray and Jessup indicated that non-senescence and  
119 rhizomatousness are essential traits in their perennial maize breeding practice<sup>(24)</sup>.

120 Perennialism appears to be a complex trait, strongly influenced by genetic and  
121 environmental factors. A perennial plant in one environment usually cannot survive in another  
122 due to the lack of the required adaptability. For example, *Z. diploperennis*, which is perennial in  
123 the highlands of Mexico, cannot survive the harsh winter in the American Midwest. The various  
124 criteria for what constitutes perennialism in *Zea* may have contributed to contradictory  
125 observations. Traits such as rhizome formation, evergreen stalks, and dormancy are important  
126 adaptive features that support the viability of various perennial plants in various environments. In  
127 this study, we take a reductionist approach and specifically focus on a plant's regrowability (i.e.  
128 the ability to maintain some juvenile meristematic tissues after each life cycle that can initiate a  
129 new life cycle). Although this trait by itself is insufficient for functional perenniality, it appears  
130 to be an essential component of perenniality in *Zea* L. Here we report the results of our genetic  
131 analysis and genome-wide screening of the regrowth trait with genotyping-by-sequencing (GBS)  
132 technology.

## 133 **Results and Discussion**

### 134 ***The production and growth of the hybrids***

135 We made reciprocal crosses of *Z. diploperennis* (Zd, hereafter in a cross combination)  
136 with the following three maize lines: B73, Mo17 and Rhee Flint (RF, hereafter in a cross  
137 combination). B73 and Mo17 are inbred lines and Rhee Flint is an heirloom maize variety. The  
138 first F<sub>1</sub> was made with Rhee Flint in a greenhouse. Rhee flint is small, fast-growing and usually

139 has tillers, which affords serial plantings with an increased opportunity of a plant simultaneously  
140 flowering with *Z. diploperennis*. Because Rhee Flint is an open-pollinated variety, later F<sub>1</sub>s were  
141 made with B73 and Mo17 to facilitate molecular analysis. All the F<sub>1</sub> plants are fertile and  
142 completed multiple cycles of growth, reproduction and senescence (Fig. 1; Supplementary Fig.  
143 S1). Regrowth (as opposed to accidental replanting from seed) of F<sub>1</sub> plants was insured by  
144 inspection that new shoots were attached to the base of the F<sub>1</sub> and confirmed by the  
145 heterozygosity of polymorphic PCR markers (examples shown in Supplementary Fig. S2).  
146 Regrowth of these F<sub>1</sub>s originates from basal axillary buds after stem senescence in all the crosses  
147 (Figs. 1D, 1E, 1F).

148 Some of the basal regrowth immediately developed into a female (Fig. 2A) or a male  
149 (Fig. 2B) inflorescence, or a forest of them (Fig. 2D). These F<sub>1</sub> plants with abnormal regrowth  
150 most often can later undergo normal regrowth in an alternative environment, such as being  
151 moved from the greenhouse to the field, etc., which suggests a strong environmental influence.  
152 No such abnormal growth has been seen in advanced generations. Sometimes, plantlets also can  
153 develop at the upper nodes of some hybrid plants when B13 and Mo17 were used as the parent  
154 (Fig. 2C). The plantlets developed at the upper nodes, however, can only survive if transplanted  
155 into soil. This indicates that the senescent stalks do not function to provide the necessary  
156 nutrients to the plantlets.

157 Because the F<sub>1</sub> plants and their perennial derivatives are not winter hardy, the  
158 regeneration cycles were alternated between the greenhouse and the field (Supplementary Figs.  
159 S1 & S3). Interestingly, the ears and kernels of the F<sub>1</sub>s of the six crosses all were more teosinte-  
160 like (i.e. two rows of oppositely positioned spikelets with paired kernels encased by woody  
161 rachides and glumes) when grown in greenhouse but were more maize-like (i.e. multiple rows of

162 naked kernels with short soft glumes and rachides around a silica-filled soft core) when grown in  
163 the field (Fig. 3). In the F<sub>2</sub> and higher generations, ear morphology segregated even under  
164 greenhouse condition (Fig. 3). These observations suggest that environmental factors are  
165 important in the preferential expression of the teosinte or the maize alleles of the genes  
166 influencing ear morphogenesis in the hybrids. These observations also indicate that it should be  
167 possible to breed regrowable maize with maize-like ears and kernels.

168         The contrast between our observations and those of some previous reports is remarkable.  
169 While we focus on a single trait, regrowth after senescence, previous studies were interested in  
170 perennialism generally using varying criteria. Conclusions that perennialism in *Zea* is recessive  
171 might have resulted from the hypothesis that traits such as tiller number at tasseling (TNT) or  
172 rhizome development are indispensable components of perennialism in *Zea*. Indeed, other  
173 studies have used rhizome development as an indicator of perennialism in *Zea*<sup>(11,16,17,22,25)</sup> and we  
174 have not observed rhizomes in any of our F<sub>1</sub>s or the derived plants. When regrowth occurs, it is  
175 always from an axillary bud. Indeed, it is also our observation that the regrowth of *Z.*  
176 *diploperennis* is mainly from basal axillary buds, and only occasionally from rhizomes. The *Z.*  
177 *perennis* - 4X maize F<sub>1</sub>s made by R. A. Emerson also were all “weekly perennial” under the  
178 environmental conditions with few or no rhizomes<sup>(10)</sup>.

179         Other possible explanations for contrasting results is that the perennial teosinte plants  
180 used in those studies were polymorphic for one or more regrowth genes, that the experimental  
181 environments were unfavorable for regrowth to happen, or that some plants needed more time to  
182 break up their dormancy. Shaver<sup>(16)</sup> and Camara-Hernandez and Mangelsdorf<sup>(25)</sup> observed that some  
183 of their F<sub>1</sub> plants eventually regrew from basal axillary buds after a period of dormancy. Indeed,  
184 some of our F<sub>2</sub> plants need about two months of dormancy before regrowth. This observation



185 reinforces the view that even regrowth is a complex trait that is modified by genetics and  
186 environment.

187 TNT has been associated with perennialism in several studies<sup>(14,17,26,27)</sup>, so we investigated  
188 the relationship of TNT with regrowth in the Zd-RF F<sub>3</sub>s. One-way ANOVA of TNT by regrowth  
189 (Supplementary Table S1), however, revealed no significant difference of TNT ( $F = 0.897, p =$   
190  $0.353$ ) between the regrowth and the non-regrowth F<sub>3</sub>s. Indeed, we observed regrowth from  
191 several single-stalked hybrid derivatives (Fig. 4A) and non-regrowth of some multi-stalked  
192 plants (Fig. 4B). These results suggest that TNT is not essential to regrowth in *Zea*.

### 193 ***The genetics of regrowth***

194 All our F<sub>1</sub> plants regrew and underwent several life cycles alternating between the  
195 greenhouse and the field. This indicates that, with our materials and in our environment,  
196 regrowth is a dominant trait. Although this contrasts with some reports, regrowable F<sub>1</sub> hybrids of  
197 maize with perennial teosintes were previously obtained by Emerson<sup>9</sup>, Shaver<sup>16</sup>, Galinat<sup>15</sup>, Ting  
198 and Yu<sup>24</sup> and Camara-Hernandez and Mangelsdorf<sup>25</sup>. Brewbaker suggested cytoplasm may  
199 contribute to perennialism<sup>28</sup>, but our reciprocal F<sub>1</sub>s performed similarly.

200 To analyze the genetics of regrowth further, 134 B73-Zd F<sub>3</sub>s (derived from several F<sub>1</sub>  
201 plants where B73 was the female) and 159 Zd-RF F<sub>3</sub>s (derived from a single F<sub>1</sub> plant where Zd  
202 was the female) were tested. Among the 134 B73-Zd F<sub>3</sub>s, 81 regrew and 53 did not (Table 1).  
203 Similarly, among the 159 Zd-RF F<sub>3</sub>s, 90 regrew after senescence and 69 did not (Table 2). One  
204 B73-Zd F<sub>3</sub> population (Supplementary Table S1) and three Zd-RF F<sub>3</sub> populations (Table 2), each  
205 of which was derived from a single regrowth F<sub>2</sub> plant, were also evaluated for their regrowth.

206 A chi square ( $\chi^2$ ) goodness-of-fit test suggests that both of the F<sub>3</sub> populations and one Zd-  
207 RF F<sub>3</sub> population (Zd-RF F<sub>3</sub>-5) we tested best fit a 9:7 regrowth to non-regrowth ratio (Table 3),

208 and the B73-Zd F<sub>3</sub> population and the remaining two Zd-RF F<sub>3</sub> populations best fit a 3:1 ratio  
209 (Table 3). The simplest model that explains these results is that regrowth in the F<sub>1</sub>s and their  
210 derivatives is mainly controlled by two dominant, complementary *regrowth* (*reg*) loci. A two  
211 dominant, complementary gene model parallels what has been found in other species, such as  
212 rice (*Oryza sativa*)<sup>(6)</sup>, Johsongrass (*Sorghum halepense*)<sup>(5,6,29)</sup>, basin wildrye (*Leymus cinereus*)<sup>(30)</sup> and  
213 wild mungbean (*Vigna radiate ssp. sublobata*)<sup>(8)</sup>, for perennialism-related traits.

214 The Zd-RF F<sub>1</sub> was also backcrossed to each parental line. All plants from the F<sub>1</sub>-to-Zd  
215 backcross regrew, showing dominant effect of the Zd alleles. However, only one of the 20 plants  
216 from the F<sub>1</sub>-to-RF backcross showed regrowth. Therefore, alternative models, such as one or  
217 three dominant complementary genes, two major genes with a few minor modifiers, or that  
218 regrowth is a complex trait controlled by many QTL, are not eliminated by this genetic analysis,  
219 but are less probable.

220 The number of regrowth plants observed in any generation might be understated, because  
221 some plants initially recorded as non-regrowth eventually regrew after about two months of  
222 dormancy. Therefore, some plants recorded as non-regrowth and discarded to open up  
223 greenhouse space may have possessed the ability to regrow. Furthermore, transplanting from the  
224 field to the greenhouse and *vice versa* is very stressful so that some regrowable plants may have  
225 been killed this way.

226 The F<sub>2</sub> and F<sub>3</sub> plants afforded an opportunity to investigate whether some factors  
227 previously implicated in perennialism may contribute to the regrowth trait. The rice  
228 rhizomatousness gene *Rhz2* has been mapped to rice chromosomes 3<sup>(6)</sup> and sorghum chromosome  
229 1<sup>(5,6,29)</sup>, which are both homoeologous to parts of maize chromosome 1<sup>(7)</sup>. Additionally, *gt1* and *idl*,  
230 which have been implicated with perenniality in *Zea*<sup>(8)</sup>, and *tbl*, which controls *gt1*<sup>(19)</sup>, are all on

231 chromosome 1 in *Zea*<sup>(19,21)</sup>. Therefore, we investigated the allele compositions of these three genes  
232 in the B73-Zd F<sub>2</sub>s (Table 1), and 26 Zd-RF F<sub>2</sub> plants and the three Zd-RF F<sub>2</sub> populations  
233 (Supplementary Table S2), and assayed their association with regrowth. Of the 134 regrowth  
234 hybrid derivatives we examined, 5, 33 and 115 were homozygous for the maize *gt1*, *tb1* or *idl*  
235 alleles, respectively (Table 1 and Supplementary Table S2). Zd-RF F<sub>2</sub> family Zd-RF F<sub>2</sub>-5 is  
236 homozygous for the *gt1* allele of *Z. diploperennis* (Supplementary Table S2) but segregates  
237 approximately 9:7 for regrowth and non-regrowth (Table 2). Therefore, our results are  
238 inconsistent with the model of Shaver<sup>16)</sup>, and show that *gt1* and *idl* do not control regrowth in our  
239 F<sub>2</sub>s and their derivatives. *Z. diploperennis*'s *gt1* allele may be helpful to regrowth because the  
240 majority of the plants that regrew had at least one copy, but it is not indispensable because some  
241 plants regrew without it.

242 Interestingly, we observed no heterozygosity for *idl* and very low heterozygosity for *tb1*  
243 in all the hybrid derivatives that were examined, regardless of regrowth (Tables 1;  
244 Supplementary Table S2). Of 134 B73-Zd F<sub>2</sub> plants, only 16 had the *Z. diploperennis idl* allele  
245 (Table 1). Similar phenomena were observed in the derivatives of the Zd-RF cross  
246 (Supplementary Table S2). It seems that the maize chromosome fragment that carries *idl* was  
247 preferentially transmitted to the hybrid derivatives. Excess homozygosity of the maize *idl* allele  
248 indicates some sort of selection. It could be that a deficiency or other rearrangement adjacent to  
249 the teosinte *idl* allele causes it not to transmit efficiently, or it could be that the teosinte *idl* or  
250 tightly linked allele causes the plant not to grow well or flower in our experimental conditions.

### 251 ***Identifying regrowth loci with genotyping-by-sequencing assay***

252 A genome-wide mining of single nucleotide polymorphisms (SNPs) was conducted in a  
253 randomly selected sub-population of 94 (55 regrowth and 39 non-regrowth) B73-Zd F<sub>2</sub> plants

254 with GBS technology (Table 1). We conducted the GBS assays to identify QTL for the regrowth  
255 trait. To prepare for these assays, a total of 2,204,834 (85.14%) Illumina sequencing tags that  
256 passed routine quality control filtrations were aligned with the B73\_v4 reference genome. A total  
257 of 714,158 SNPs, covering all ten chromosomes with an average of 71,416 SNPs per  
258 chromosome, were then called from 83 (46 regrowth and 37 non-regrowth, labeled in bold in  
259 Table 1) of the 94 F<sub>2</sub> plants using TASSEL 3 pipeline<sup>(31,32)</sup>. SNP-calling for the excluded 11 plants  
260 probably failed due to an error in barcode addition before sequencing. These SNPs were first  
261 subjected to a two-step filtration in TASSEL 3 (MergeDuplicateSNPsPlugin and  
262 GBSHapMapFiltersPlugin) to remove SNPs with poor qualities (see the Materials & Methods  
263 section and Supplementary Table S3 for the details), which resulted in 37,925 SNPs (Table 4, 1<sup>st</sup>  
264 filtration). The 37,925 SNPs were then manually filtered with high missing data rate > 20%,  
265 which resulted in 10,432 remaining SNPs among all ten chromosomes (Table 4, 2<sup>nd</sup> filtration).

266 To explore which chromosomal regions may control the regrowth phenotype, the 10,432  
267 SNPs from the 2<sup>nd</sup> filtration step were pooled for QTL analysis using R/qtl (version 1.42-8)  
268 (Supplementary Table S4). The result is shown in Figure 5A. A total of 126 SNPs (104 real sites  
269 and 22 simulated sites) showed LOD scores higher than 3.00. A permutation test of 1,000 with  
270 the *p*-value of 0.05 resulted in a significant LOD score of 5.23 (Fig. 5A). This significance  
271 threshold revealed two major QTL with one at 33,041,409 bp (the nucleotide position in the  
272 B73\_v4 reference genome sequence) on chromosome 2 with a LOD score of 5.46 and one at  
273 4,284,633 bp on chromosome 7 with a LOD score of 5.53, respectively.

274 To test if the two strongest QTL correspond to two dominant and complementary loci  
275 suggested by the genetic analysis, we applied a  $\chi^2$  test with 9:7 allele segregation ratio model to  
276 the 10,431 SNPs to investigate if the observed and the expected genotypes are significantly

277 different ( $p \leq 0.05$ ). This is based on our hypothesis that, if a SNP is associated with a *reg* locus,  
278 the teosinte allele of the SNP should be carried by all the regrowable F<sub>2</sub>s but only by three  
279 sevenths non-regrowable F<sub>2</sub>s. This step kept 946 SNPs (Table 4, 3<sup>rd</sup> filtration). Finally, to  
280 simplify the mapping effort, the 946 SNPs were filtered once more by collapsing immediately  
281 neighboring SNPs that share the same haplotypes into one cluster. This step resulted in 597 SNP  
282 cluster with each being represented by the first SNP in the cluster (Table 4, 4<sup>th</sup> filtration). Locus  
283 mapping was then conducted with a threshold of  $LOD_{95\%} = 4.17$ . This analysis revealed two  
284 significant loci with one on chromosome 2 in the interval from 24,244,192 bp to 28,975,747 bp  
285 with the peak at 27,934,739 bp and another on chromosome 7 in the interval from 2,862,253 bp  
286 to 6,681,861 bp with the peak at 5,060,739 bp (Fig. 5B). These two loci were mapped closely to  
287 the two major QTL indicated by the mapping without imputation. These results are consistent  
288 with the two-factor model, which warrants further investigation. To that end we are naming the  
289 factor underlying the chromosome 2 QTL *regrowth 1 (reg1)* and the factor underlying the  
290 chromosome 7 QTL as *regrowth 2 (reg2)*.

291 Our LOD analysis located two minor peaks on chromosome 1 that are associated with  
292 regrowth (Fig. 5B). We wanted to know if these two loci are related to *gt1* and *idl*, respectively.  
293 The SNPs at the peak of these loci are at 82,273,951 bp and 177,235,112 bp, far away from *idl*  
294 (around 243,201,405 bp) and *gt1* (around 23,625,801 bp) (Fig. 6). These observations further  
295 indicate that *idl* and *gt1* are not related to regrowth. Also, previous studies reported that *Z.*  
296 *diploperennis* carried perennialism-related *Pe\*-d* and an evergreen gene on chromosome 4<sup>(15,19)</sup>.  
297 However, our data could not support these observations since no SNP on chromosome 4 is  
298 significantly associated with regrowth (Figs. 5 and 6).

299 In summary, the results presented here indicate that regrowth in *Zea* is inherited

300 dominantly in our experimental conditions. Both the genetic and GBA analyses support a model  
301 where the regrowth trait is mainly controlled by two major regrowth loci, *reg1* and *reg2* on  
302 chromosomes 2 and 7, respectively. Even so, the data do not eliminate more complex models.  
303 Identification and functional study of the candidate genes for *reg1* and *reg2* and their possible  
304 modifiers will initiate an understanding about the molecular mechanism of perenniality in *Zea L.*  
305 We recognize that adaptability is very important for a plant to realize perennialism in a certain  
306 environment. However, this issue can be addressed separately after we understand molecularly  
307 how *Z. diploperennis* is regrowable.

## 308 **Materials and Methods**

### 309 Plant materials and phenotyping

310 *Zea diploperennis* (PI 462368) and *Z. mays* cv. Rhee Flint (PI 213764) were obtained  
311 from the USDA North Central Region Plant Introduction Station, Ames, IA. B73 and Mo17  
312 inbreds were from the collection of D. Auger and are traceable back to the Maize Genetics  
313 Cooperation Stock Center, Urbana/Champaign, IL. In our designations of F<sub>1</sub>s and their  
314 derivatives, the female parental is shown first. All the plants used in this study were grown in the  
315 greenhouse during the winter and in the field during the summer in Brookings, SD. Controlled  
316 pollinations were done by covering tassels and ears with paper bags before and after the  
317 pollination was made. In the greenhouse, plants were maintained with a 16 h-light/8 h-dark cycle  
318 and 20/16 °C day/night temperature except that two-month old *Z. diploperennis* and its hybrid  
319 plants were treated with a 10 h light/14 h dark cycle for four weeks to induce the floral transition.

320 Plants were scored as regrowth if they produced shoots from the basal axillary buds after  
321 the original stalks finished flowering and senesced. Rhizome and tuber development were  
322 visually investigated on plants that were dug from the soil after senescence. TNT was

323 investigated by counting numbers of tillers per plant when the tassel had fully emerged. Ear and  
324 kernel morphology was visually examined and photographed.

### 325 PCR assay

326 DNA samples were isolated from young leaves using the CTAB procedure<sup>(33)</sup> and used for  
327 PCR-based marker assay. Table 5 lists all the PCR primers used in this study. PCR assays were  
328 done using GoTaq Green Master Mix (Catalog# M7505, Promega, Madison, WI) at the  
329 following conditions: 95°C, 35 cycles of 95°C for 45 sec, 55~62°C (primer dependent, see Table  
330 6 for detail) for 1 min and 72°C for 1 min, and 72°C for 10 min. The annealing temperatures  
331 were determined using a 1°C-touchdown PCR step starting from 65°C.

### 332 SNP discovery

333 The GBS assay was conducted according to Elshire and the associates<sup>(31)</sup>. The preparation  
334 and sequencing of the library were conducted by the University of Wisconsin Biotechnology  
335 Center (UWBRC). Generally, DNA samples were digested with *ApeKI* restriction enzyme (RE),  
336 and unique barcodes were annealed to each DNA fragments. A single-end 100 bp (1x100bp)  
337 sequencing run was carried out on an Illumina HiSeq 2500 platform. The raw data were pooled  
338 as a single fastq file and downloaded from UWBRC.

339 The TASSEL (Trait Analysis by Association, Evolution and Linkage) 3 pipeline was  
340 used under the guidance of TASSEL manual<sup>(32)</sup> for the discovery of SNPs between *Z.*  
341 *diploperennis* and *Z. mays* (Supplementary Table S3). The barcoded sequence reads were  
342 collapsed into a set of unique sequence tags with counts. The tag count files were filtered for a  
343 minimum count threshold and merged into the master tag count file. The B73\_RefGen\_V4  
344 reference genome sequence was downloaded from MaizeGDB and processed with Bowtie2 for  
345 alignment<sup>(34)</sup>. Master tags were aligned to the B73 reference genome to generate a "Tags On

346 Physical Map" (TOPM) file, which contains the genomic position of each tag with the best  
347 unique alignment. The occupancies of tags for each taxon were observed from barcodes  
348 information in the original FASTQ files. Tag counts were stored in a "Tags by Taxa" (TBT) file.  
349 The TOPM and TBT files were used to call SNPs at the tag locations on the genome. The SNPs  
350 were filtered by minimum tag counts of 5, genotype mismatch rate of 0.1, minimum taxon  
351 coverage of 0.01, minimum site coverage of 0.2 and minimum minor allele frequency of 0.01.  
352 Fastq files containing sequences of chromosomes 1 to 10 were merged by FASTX\_Toolkit and  
353 indexed. All commands for SNP discovery were executed in Ubuntu 16.04 LTS platform.

354 SNPs resulted from TASSEL filters plugin with a minimum minor allele frequency of  
355 0.01 were filtered again by removing sites that had missing data in more than 20% of the B73-Zd  
356 F<sub>2</sub> plants. For those SNPs that have missing data in less than 20% of the B73-Zd F<sub>2</sub> plants, the  
357 missing data were imputed by treating them as heterozygote since both two alleles can be  
358 embodied and considered to be moderate. The SNPs from the 2<sup>nd</sup> filtration identification were  
359 used for QTL mapping. To understand the relationship between the mapped QTL with the  
360 genetic factors revealed by the genetic analysis, the SNPs from the 2<sup>nd</sup> filtration were further  
361 filtered (the 3<sup>rd</sup> filtration) with  $\chi^2$  ( $p < 0.05$ ). For each regrowth-associated SNP, we expected, in  
362 the regrowable subpopulation, 33.3% plants to carry the homozygous Zd alleles (AA) and 66.6%  
363 to have the Zd-B73 heterozygous allele combination (AB) and none with the B73 homozygous  
364 alleles (BB) and, in the non-regrowable subpopulation, 14% of the plants with AA, 28.6% with  
365 AB and 57.1% with BB. Altogether, a  $\chi^2$  contingency table were generated with expected  
366  $\chi^2_{0.05,4} = 9.49$ . Any SNPs with  $\chi^2 < 9.49$  were kept fitting the 9:7 segregation model. The 4<sup>th</sup> SNP  
367 filtration was performed to keep the first SNP and remove the rest in a cluster in which all the  
368 SNPs in the range of 100 bp share the same haplotypes. In the locus analysis with the chi-square



369 imputation, such a cluster of SNPs was treated as one locus. Removing the redundant SNPs  
370 makes the locus analysis more precise because repeated SNP sites would affect the LOD value  
371 and influence the interval estimation.

372 The SNPs after the 2nd and the 4th filtrations were used for candidate locus/QTL  
373 estimation, respectively. The locus analysis was executed by a standard QTL procedure in *R*  
374 using the *R/qtl* package (version 1.40-8)<sup>(35)</sup> to better observe the contribution of each SNP and its  
375 neighbors. The *R* codes used for the analyses are listed in Supplementary Table S4. Position  
376 simulation was drawn with a maximum distance of 1.0 cM and an error probability of  $1 \times 10^{-4}$ . The  
377 conditional genotype probability (*calc.genoprob*), as well as simulated genotypes (*sim.geno* with  
378 *n.draw*=32), were calculated. The “haldane” function was used to convert genetic distances into  
379 recombination fractions. Genome scan with a single locus model (*scanone*) was performed with a  
380 binary model using the expectation-maximization algorithm<sup>(35)</sup>. A permutation test with 1000  
381 replicates was performed in *scanone* to visualize the LOD thresholds. We determined a locus  
382 interval by selecting the first and last SNP sites with significant LOD value. Genes within the  
383 intervals were identified by searching the corresponding region on the Gramene website.

#### 384 Statistical analyses

385 For statistical analyses, all genotypes and phenotypes were transformed into numeric  
386 values. For phenotypes, the regrowth plants were scored as “1” and the non-regrowth plants were  
387 scored as “2”. For genotypes, the plants that were homozygous to the *Z. diploperennis* allele  
388 were scored as “1”; those that were homozygous to the B73 or Rhee Flint allele were scored as  
389 “2”; and those that were heterozygous were scored as “3”. When conducting locus analysis,  
390 genotype “1” was transformed to “AA”, “2” to “BB” and “3” to “AB”.

391 A chi square goodness-of-fit test was used to find the best-fit model or linkage in the

392 genetic analysis and reveal candidate loci on chromosomes. To determine if TNT has any  
393 correlation with regrowth, a One-Way ANOVA of TNT by regrowth was performed in JMP  
394 (JMP® 11.2.0).

#### 395 Sequencing Data availability

396 All raw fastq data from this study are available at NCBI data deposition site  
397 (<https://www.ncbi.nlm.nih.gov/bioproject/>) with accession number PRJNA477673.

398 **Acknowledgement** This research was partially supported by funds from USDA-NIFA via  
399 South Dakota Experiment Station and Department of Biology and Microbiology, South Dakota  
400 State University. We greatly appreciate Dr. Frank M. You of Agriculture and Agri-Food Canada  
401 for his help in statistics.

402 **Author Contributions** Y.Y. designed and supervised this project and all the experiments,  
403 and drafted the manuscript; Y.Q., A.M., T.R., B.P., A.G., Y.Z., Y.Y. & D.A. performed the  
404 experiments and collected data; Y.Q., A.M., T.R., D.A. & Y.Y. analyzed the data; all authors  
405 discussed the results and communicated on and approved the final manuscript.

406 **Competing financial interests** The authors declare no competing financial interests.

#### 407 **References**

- 408 1. Haferkamp MR, Copeland TD (1984) Shoot growth and development of Alamo switchgrass  
409 as influenced by mowing and fertilization. *J Range Management* 37: 406-412.
- 410 2. Boe A, Owens V, Gonzalez-Hernandez J, Stein J, Lee DK, Koo BC. (2009) Morphology and  
411 biomass production of prairie cordgrass on marginal lands. *GCB Bioenergy* 1:240-250.
- 412 3. Jackson LL, Dewald CL (1994) Predicting evolutionary consequences of greater

- 413 reproductive effort in *Tripsacum dactyloides*, a perennial grass. *Ecology* 75:627-641.
- 414 4. Melzer S, Lens F, Gennen J, Vanneste S, Rohde A, Beeckman T (2008) Flowering-time  
415 genes modulate meristem determinacy and growth form in *Arabidopsis thaliana*. *Nat Genet*  
416 40:1489-1492.
- 417 5. Paterson AH, Schertz KF, Lin Y, Liu S, Chang Y (1995) The weediness of wild plants:  
418 Molecular analysis of genes influencing dispersal and persistence of johnsongrass, *Sorghum*  
419 *halepense* (L.) Pers. *PNAS* 92:6127-6131.
- 420 6. Hu FY, Tao DY, Sacks E, Fu BY, Xu P, Li j, Yang Y, McNally K, Khush GS, Paterson AH,  
421 Li ZK (2003) Convergent evolution of perenniality in rice and sorghum. *PNAS* 100:4050-  
422 4054.
- 423 7. Wei F, Coe E, Nelson W, Bharti AK, Engler F, Butler E, et al. (2007) Physical and genetic  
424 structure of the maize genome reflects its complex evolutionary history. *PLoS Genet* 3: e123.
- 425 8. Nguyen TD, Lawn RJ, Bielig LM (2012) Expression and inheritance of perenniality and  
426 other qualitative traits in hybrids between mungbean cultivars and Australian wild  
427 accessions. *Crop & Pasture Sci* 63:619-634.
- 428 9. Ryder N, Dorn KM, Huitsing M, Adams M, Ploegstra J, DeHaan L, Larson S, Tintle N  
429 (2018) Transcriptome assembly and annotation of johnsongrass (*Sorghum halepense*)  
430 rhizomes identify candidate rhizome-specific genes. *Plant Direct* 2:e00065.
- 431 10. Emerson RA, Beadle GW (1930) A Fertile Tetraploid Hybrid Between *Euchlaena perennis*  
432 and *Zea mays*. *Am Nat* 64:190-192.
- 433 11. Srinivasan G, Brewbaker, JL (1999) Genetic analysis of hybrids between maize and  
434 perennial teosinte. I. Morphological traits. *Maydica* 44:353-369.

- 435 12. Galinat WC (1981a). Evergreen stalks as an indicator of perennialism. *MNL* 55:107.  
436 (personal communication per the policy of MNL)
- 437 13. Mangelsdorf PC, Dunn ME (1984a) Various expressions and dominance relations of  
438 perennialism. *MNL* 58:53. (personal communication per the policy of MNL)
- 439 14. Westerbergh A, Doebley J (2004) Quantitative trait loci controlling phenotypes related to the  
440 perennial versus annual habit in wild relatives of maize. *Theor Appl Genet* 109:1544-1553.
- 441 15. Galinat WC (1981b) The inheritance and linkage of perennialism derived from diploperennis.  
442 *MNL* 55:107. (personal communication per the policy of MNL)
- 443 16. Shaver DL (1967) Perennial maize. *J. Hered* 58:271-273.
- 444 17. Shaver DL (1964) Perennialism in *Zea*. *Genetics* 50:393-406.
- 445 18. Mangelsdorf PC, Dunn ME (1984b) Linkage relations of Pe\*-d. *MNL* 58:54. (personal  
446 communication per the policy of MNL)
- 447 19. Whipple CJ, Kebrom TH, Weber AL, Yang F, Hall D, Meeley R, Schmidt R, Doebley J,  
448 Brutnell T, Jackson DP (2011) *grassy tillers1* promotes apical dominance in maize and  
449 responds to shade signals in the grasses. *PNAS* 108:E506-E512.
- 450 20. Singleton WR (1946) Inheritance of indeterminate growth in maize. *J Hered* 37:61-64.
- 451 21. Colasanti J, Yuan Z, Sundaresan V (1998) The *indeterminate* gene encodes a zinc finger  
452 protein and regulates a leaf-generated signal required for the transition to flowering in maize.  
453 *Cell* 93:593-603.
- 454 22. Mangelsdorf PC, Roberts LM, Rogers S (1981) Crosses of *Zea diploperennis* with corn.  
455 *MNL* 55:19-21. (personal communication per the policy of MNL)
- 456 23. Ting YC, Yu MK (1982) Further studies of F1 hybrids of maize x diploid perennial teosinte.  
457 *MNL* 56:35-36. (personal communication per the policy of MNL)

- 458 24. Murry SC, Jessup RW. 2013. Breeding and genetics of perennial maize: Progress,  
459 opportunities and challenges. In: *Perennial Crops for Food Security, Proceedings of the FAO*  
460 *Expert Workshop*, August 28-30, 2013, Rome, Italy, pp103-111.
- 461 25. Camara-Hernandez J, Mangelsdorf PC (1981) Crosses of *Zea diploperennis* with corn. *MNL*  
462 55:15-17. (personal communication per the policy of MNL)
- 463 26. Doebley J, Stec A, Hubbard L (1997) The evolution of apical dominance in maize. *Nature*  
464 386:485-488.
- 465 27. Camara-Hernandez J, Mangelsdorf PC (1981) Crosses of *Zea diploperennis* with corn. *MNL*  
466 55:15-17. (personal communication per the policy of MNL)
- 467 28. Brewbaker JL (2007) Grassy tiller and sweet corn. *MNL* 81:12. (personal communication per  
468 the policy of MNL)
- 469 29. Washburn JD, Murray SC, Burson BL, Klein RR, Jessup R. 2013. Targeted mapping of  
470 quantitative trait locus regions for rhizomatousness in chromosome SBI-01 and analysis of  
471 overwintering in a *Sorghum bicolor* X *S. propinquum* population. *Mol Breed* 31:153-162.
- 472 30. Yun L, Larson SR, Mott IW, Jensen KR, Staub JE (2014) Genetic control of rhizomes and  
473 genomic localization of a majoreffect growth habit QTL in perennial wildrye. *Mol Genet*  
474 *Genomics* 289:383-397.
- 475 31. Elshire RJ, Glaubitz JC, Sun Q, Poland JA, Kawamoto K, Buckler ES, Mitchell SE (2011) A  
476 robust, simple genotyping-by-sequencing (GBS) approach for high diversity species. *PLoS*  
477 *ONE* 6:e19379.
- 478 32. Glaubitz JC, Casstevens TM, Lu F, Harriman J, Elshire RJ, Sun Q, et al. (2014) TASSEL-  
479 GBS: A high capacity genotyping by sequencing analysis pipeline. *PLoS ONE* 9: e90346.
- 480 33. Doyle JJ, Doyle JL (1990) Isolation of plant DNA from fresh tissue. *Focus* 12:13-15.

481 34. Langmead B, Salzberg S (2012) Fast gapped-read alignment with Bowtie 2. *Nature Methods*  
482 9:357-359.

483 35. Broman KW, Wu H, Sen S, Churchill GA (2003) R/qtl: QTL mapping in experimental  
484 crosses. *Bioinformatics* 19:889-890.

485 **Table legends:**

486 Table 1. The regrowth (R) and the non-regrowth (NR) phenotypes and the marker genotypes of  
487 *Zea diploperennis* (Zd), *Z. mays* B73 and their 134 F<sub>2</sub> plants\*.

488 Table 2. Segregation of regrowth among the *Zea diploperennis*-*Z. mays* cv Rhee Flint F<sub>2</sub>s and F<sub>3</sub>s.

489 Table 3. Results of the  $\chi^2$  goodness-of-fit tests of three genetic models.

490 Table 4. The actions taken and the numbers of SNPs revealed in each filtration step of SNP  
491 analysis of *Zea mays* B13 - *Z. diploperennis* F<sub>2</sub> plants.

492 Table 5. PCR primers used in this study.

493 **Figure legends:**

494 Figure 1. Photos of *Zea mays* and *Z. diploperennis* (Zd) F<sub>1</sub> plants. **A:** reciprocal Mo17-Zd (right)  
495 and Zd-Mo17 (left) F<sub>1</sub> plants; **B:** reciprocal B73-Zd (right) and Zd-B73 (left) F<sub>1</sub> plants; **C:** RF-Zd  
496 F<sub>1</sub> plant; **D:** regrowth of a Mo17-Zd F<sub>1</sub> plant; **E:** regrowth of a B73-Zd F<sub>1</sub> plant; and **F:** regrowth  
497 of a RF-Zd F<sub>1</sub> plant. B73, Mo17 and RF represent, respectively, inbred lines B73 and Mo17 and  
498 cultivar Rhee Flint of *Z. mays*.

499 Figure 2. Photos of abnormal F<sub>1</sub> plants of crosses of *Zea diploperennis* with *Z. mays* inbred lines  
500 B73 (A & B) and Mo17 (C) or cv. Rhee Flint (D).

501 Figure 3. Photos of the ears produced from a *Zea mays* cv Rhee Flint x *Z. diploperennis* F<sub>1</sub> plant  
502 in different seasons (the upper panel) and from F<sub>2</sub> in summer 2014 in greenhouse (the lower

503 panel).

504 Figure 4. Photos of *Zea mays* Mo17-*Z. diploperennis* F<sub>2</sub> plants, showing regrowth from the basal  
505 node of a single-stalked plant (A) or non-regrowth from a multi-stalked plant (B).

506 Figure 5. Graphics showing LOD scores of the QTL mapping the B73-Zd F<sub>2</sub> population without  
507 (A) or with (B) chi-square imputation. The 95% threshold lines (the parallel red dash lines) were  
508 calculated with 1,000 permutation. Significant QTL/loci are indicated by the location of the peak  
509 SNPs of the loci.

510 Figure 6. Genetic map of 30 representing SNPs and genes *gt1*, *idl*, and *tb1*. Each SNP represents  
511 a one- Mbp region except of SNP S2\_27934739, which represent a SNP cluster.

#### 512 **Supplementary documents:**

513 Supplementary Table S1. Segregation of regrowability among the B73-Zd F<sub>2</sub>s.

514 Supplementary Table S2. Phenotypes and the *gt1*, *idl* and *tb1* haplotypes of 26 F<sub>2</sub> plants and  
515 three F<sub>3</sub> populations of the *Zea mays* cv. Rhee Flint x *Z. diploperennis* cross.

516 Supplementary Table S3. Steps and codes in TASSEL pipeline including example command  
517 lines and brief descriptions. Parameters are highlighted and described when first be used.

518 Supplementary Table S4. R codes used for candidate locus/QTL analyses.

519 Supplementary Figure S1. A photo showing the growth of *Zea diploperennis* and its F<sub>1</sub> with *Z.*  
520 *mays* B73 or Mo17 in the field in the Summer 2017.

521 Supplementary Figure S2. An agarose gel image showing that two molecular markers confirmed

522 the heterozygosity of a *Z. diploperennis*-*Z. mays* cv. Rhee Flint F<sub>1</sub> plant over three life-cycles.

523 Supplementary Figure S3. A photo showing the regrowth of the B73 - *Z. diploperennis* F<sub>1</sub>s in the

524 summer, 2017.



**Table 1.** Phenotypes and genotypes of the *Zea mays* B73-*Z. diploperennis* F2s

| Plant*                          | PT | <i>gtl</i> | <i>tbl</i> | <i>idl</i> | Plant*            | PT | <i>gtl</i> | <i>tbl</i> | <i>idl</i> | Plant*            | PT | <i>gtl</i> | <i>tbl</i> | <i>idl</i> |
|---------------------------------|----|------------|------------|------------|-------------------|----|------------|------------|------------|-------------------|----|------------|------------|------------|
| <b><i>Zea diploperennis</i></b> | 1  | 1          | 1          | 1          | <b>BZ2-006-9</b>  | 1  | 1          | 1          | 2          | BZ2-009-6         | 1  | 1          | 1          | 2          |
| B73                             | 2  | 2          | 2          | 2          | <b>BZ2-006-10</b> | 1  | 1          | 3          | 2          | BZ2-009-7         | 2  | 1          | -          | 2          |
| BZ2-001-1                       | 1  | 1          | 3          | 2          | BZ2-006-11        | 2  | 3          | 2          | 2          | <b>BZ2-009-8</b>  | 2  | 3          | 2          | 2          |
| BZ2-001-2                       | 1  | 3          | 3          | 1          | <b>BZ2-006-12</b> | 2  | 3          | 3          | 2          | <b>BZ2-009-9</b>  | 1  | 3          | 1          | 2          |
| BZ2-001-3                       | 1  | 1          | 3          | 2          | BZ2-006-13        | 2  | 3          | 2          | 1          | <b>BZ2-009-10</b> | 2  | 1          | 3          | 2          |
| BZ2-001-4                       | 1  | 1          | 3          | 2          | <b>BZ2-006-14</b> | 1  | 3          | 2          | 2          | BZ2-009-11        | 1  | 1          | 3          | 2          |
| <b>BZ2-001-5</b>                | 1  | 1          | 1          | 2          | <b>BZ2-007-1</b>  | 2  | 3          | 2          | 2          | <b>BZ2-009-12</b> | 1  | 3          | 3          | 2          |
| BZ2-002-1                       | 2  | 1          | 3          | 2          | BZ2-007-2         | 2  | 3          | 2          | 2          | <b>BZ2-010-1</b>  | 1  | 3          | 2          | 2          |
| BZ2-002-2                       | 2  | 1          | 2          | 2          | <b>BZ2-007-3</b>  | 1  | 1          | 2          | 2          | <b>BZ2-010-2</b>  | 2  | -          | 3          | 2          |
| BZ2-002-3                       | 1  | 3          | 3          | 2          | BZ2-007-4         | 1  | 3          | 2          | 2          | <b>BZ2-010-3</b>  | 1  | 3          | 1          | 2          |
| BZ2-002-4                       | 1  | 3          | 2          | 1          | <b>BZ2-007-5</b>  | 1  | 3          | 3          | 2          | BZ2-010-4         | 1  | 3          | 2          | 1          |
| BZ2-002-5                       | 2  | 3          | 3          | 2          | <b>BZ2-007-6</b>  | 2  | 3          | 3          | 2          | <b>BZ2-010-5</b>  | 2  | 3          | 1          | 2          |
| BZ2-002-6                       | 2  | 3          | 2          | 2          | <b>BZ2-007-7</b>  | 1  | 1          | 3          | 2          | <b>BZ2-010-6</b>  | 1  | 3          | 2          | 2          |
| <b>BZ2-002-7</b>                | 2  | 3          | 2          | 2          | BZ2-007-8         | 1  | 3          | 1          | 2          | <b>BZ2-010-7</b>  | 2  | 3          | 1          | 2          |
| BZ2-002-8                       | 1  | 1          | -          | 2          | BZ2-007-9         | 1  | 3          | 1          | 2          | <b>BZ2-010-8</b>  | 1  | 3          | 2          | 2          |
| <b>BZ2-002-9</b>                | 1  | 3          | 2          | 2          | <b>BZ2-007-10</b> | 2  | 1          | 3          | 2          | <b>BZ2-010-9</b>  | 1  | 1          | 3          | 2          |
| <b>BZ2-002-10</b>               | 1  | 3          | 3          | 2          | BZ2-007-11        | 2  | 3          | 1          | 2          | <b>BZ2-010-10</b> | 1  | 3          | 2          | 2          |
| <b>BZ2-002-11</b>               | 2  | 1          | 2          | 1          | <b>BZ2-007-12</b> | 1  | 1          | 2          | 2          | <b>BZ2-010-11</b> | 1  | 2          | 3          | 2          |
| BZ2-002-12                      | 1  | 1          | 2          | 2          | <b>BZ2-007-13</b> | 1  | 3          | 1          | 2          | <b>BZ2-010-12</b> | 2  | 2          | 3          | 2          |
| BZ2-002-13                      | 1  | 3          | 3          | 2          | <b>BZ2-007-14</b> | 2  | 1          | 3          | 2          | <b>BZ2-010-13</b> | 1  | 3          | 3          | 2          |
| BZ2-002-14                      | 2  | 1          | 1          | 2          | BZ2-007-15        | 2  | 3          | 1          | 2          | BZ2-010-14        | 1  | 1          | 2          | 2          |
| BZ2-002-15                      | 1  | 1          | 3          | 1          | <b>BZ2-007-16</b> | 1  | 1          | 3          | 2          | <b>BZ2-010-15</b> | 2  | 3          | 3          | 2          |
| BZ2-002-16                      | 1  | 3          | 3          | 1          | <b>BZ2-007-17</b> | 2  | 1          | -          | 1          | <b>BZ2-010-16</b> | 2  | 1          | 3          | 2          |
| <b>BZ2-002-17</b>               | 2  | 3          | 2          | 2          | <b>BZ2-007-18</b> | 1  | 1          | 1          | 2          | BZ2-010-17        | 1  | 1          | 3          | 2          |
| <b>BZ2-002-18</b>               | 1  | 1          | 2          | 2          | <b>BZ2-007-19</b> | 1  | 3          | 2          | 2          | <b>BZ2-010-18</b> | 2  | 3          | 3          | 2          |
| BZ2-002-19                      | 1  | 1          | 2          | 2          | <b>BZ2-007-20</b> | 1  | 3          | 2          | 2          | <b>BZ2-010-19</b> | 1  | 2          | 2          | 1          |
| BZ2-002-20                      | 1  | 1          | 2          | 2          | <b>BZ2-007-21</b> | 2  | 3          | 2          | 2          | <b>BZ2-010-20</b> | 2  | 1          | 2          | 1          |
| <b>BZ2-002-21</b>               | 1  | 1          | 2          | 1          | BZ2-008-1         | 1  | 1          | 1          | 2          | BZ2-010-21        | 2  | 3          | 3          | 2          |
| <b>BZ2-002-22</b>               | 1  | 3          | 2          | 2          | <b>BZ2-008-2</b>  | 1  | 3          | 1          | 2          | BZ2-011-1         | 2  | 1          | -          | 1          |
| <b>BZ2-002-23</b>               | 1  | 3          | 2          | 1          | BZ2-008-3         | 1  | 3          | 1          | 2          | <b>BZ2-011-2</b>  | 1  | 3          | 2          | 2          |
| BZ2-002-24                      | 1  | 3          | 2          | 2          | BZ2-008-4         | 2  | 3          | 2          | 2          | BZ2-011-3         | 1  | 2          | 3          | 2          |
| BZ2-002-25                      | 2  | 1          | 2          | 2          | <b>BZ2-008-5</b>  | 1  | 3          | 3          | 2          | <b>BZ2-011-4</b>  | 1  | 3          | 1          | 2          |
| BZ2-004-1                       | 1  | 3          | 1          | 2          | <b>BZ2-008-6</b>  | 2  | 3          | 2          | 2          | BZ2-011-5         | 1  | 1          | -          | 1          |
| BZ2-004-2                       | 1  | 1          | 3          | 2          | <b>BZ2-008-7</b>  | 2  | 3          | 3          | 2          | <b>BZ2-011-6</b>  | 2  | 3          | 2          | 2          |
| <b>BZ2-004-3</b>                | 2  | 3          | 2          | 2          | <b>BZ2-008-8</b>  | 1  | 3          | 2          | 2          | <b>BZ2-011-7</b>  | 2  | 1          | 2          | 2          |
| BZ2-004-4                       | 1  | 1          | 3          | 2          | <b>BZ2-008-9</b>  | 2  | 3          | 2          | 2          | <b>BZ2-011-8</b>  | 2  | 2          | 1          | 1          |
| <b>BZ2-004-5</b>                | 1  | 3          | 2          | 2          | <b>BZ2-008-10</b> | 1  | 1          | 1          | 2          | <b>BZ2-011-9</b>  | 1  | 3          | 2          | 2          |
| <b>BZ2-004-6</b>                | 1  | 3          | 1          | 2          | <b>BZ2-008-11</b> | 2  | 3          | 2          | 2          | BZ2-011-10        | 1  | 3          | 1          | 2          |
| <b>BZ2-006-1</b>                | 2  | 3          | 1          | 2          | <b>BZ2-008-12</b> | 1  | 3          | 3          | 2          | BZ2-011-11        | 1  | 1          | 2          | 2          |
| BZ2-006-2                       | 2  | 1          | 1          | 2          | <b>BZ2-008-13</b> | 1  | 1          | 2          | 2          | <b>BZ2-011-12</b> | 1  | 1          | 3          | 2          |
| BZ2-006-3                       | 1  | 3          | 3          | 2          | <b>BZ2-008-14</b> | 2  | 1          | 3          | 2          | <b>BZ2-011-13</b> | 1  | 3          | 1          | 2          |
| BZ2-006-4                       | 1  | 3          | 2          | 2          | <b>BZ2-009-1</b>  | 2  | 3          | 3          | 2          | <b>BZ2-011-14</b> | 2  | 3          | 1          | 2          |
| BZ2-006-5                       | 1  | 3          | 3          | 2          | BZ2-009-2         | 1  | 1          | 3          | 1          | BZ2-011-15        | 2  | 3          | 3          | 2          |
| <b>BZ2-006-6</b>                | 2  | 3          | 3          | 2          | <b>BZ2-009-3</b>  | 2  | 3          | 2          | 2          | <b>BZ2-011-16</b> | 2  | 1          | 2          | 2          |
| <b>BZ2-006-7</b>                | 1  | 3          | 1          | 2          | <b>BZ2-009-4</b>  | 1  | 1          | 3          | 2          |                   |    |            |            |            |
| BZ2-006-8                       | 1  | 3          | 1          | 2          | <b>BZ2-009-5</b>  | 2  | 3          | 3          | 2          |                   |    |            |            |            |

\* Bold: used for SNP calling in GBS; 1: homozygous Zm allele; 2:homozygous B73 allele; 3: heterozygous; -: missing data

**Table 2.** Segregation of regrowth among the *Zea mays* cv Rhee Flint-*Z. diploperennis* F2s and F3s.

| Plant      | PT | Plant      | PT | Plant       | PT | Plant       | PT | Plant       | PT | Plant       | PT | Plant                                           | PT |
|------------|----|------------|----|-------------|----|-------------|----|-------------|----|-------------|----|-------------------------------------------------|----|
| ZR2-001-1  | 1  | ZR2-001-33 | 2  | ZR2-001-69  | 0  | ZR2-001-102 | 1  | ZR2-001-132 | 2  | ZR2-001-162 | 2  | ZR3-005-7                                       | 1  |
| ZR2-001-2  | 2  | ZR2-001-34 | 1  | ZR2-001-71  | 1  | ZR2-001-103 | 1  | ZR2-001-133 | 1  | ZR2-001-163 | 1  | ZR3-005-8                                       | 1  |
| ZR2-001-3  | 1  | ZR2-001-35 | 2  | ZR2-001-72  | 0  | ZR2-001-104 | 1  | ZR2-001-134 | 1  | ZR2-001-164 | 1  | ZR3-005-9                                       | 1  |
| ZR2-001-4  | 2  | ZR2-001-36 | 2  | ZR2-001-73  | 1  | ZR2-001-105 | 1  | ZR2-001-135 | 2  | ZR2-001-165 | 2  | ZR3-005-10                                      | 1  |
| ZR2-001-5  | 1  | ZR2-001-37 | 2  | ZR2-001-74  | 1  | ZR2-001-106 | 1  | ZR2-001-136 | 2  | ZR2-001-166 | 1  | ZR3-005-11                                      | 2  |
| ZR2-001-6  | 1  | ZR2-001-38 | 2  | ZR2-001-75  | 1  | ZR2-001-107 | 2  | ZR2-001-137 | 1  | ZR2-001-167 | 2  | ZR3-005-12                                      | 2  |
| ZR2-001-7  | 2  | ZR2-001-39 | 1  | ZR2-001-77  | 0  | ZR2-001-108 | 2  | ZR2-001-138 | 1  | ZR2-001-168 | 2  | ZR3-005-13                                      | 1  |
| ZR2-001-9  | 1  | ZR2-001-40 | 2  | ZR2-001-78  | 0  | ZR2-001-109 | 2  | ZR2-001-139 | 1  | ZR2-001-169 | 2  | ZR3-005-14                                      | 2  |
| ZR2-001-10 | 2  | ZR2-001-42 | 2  | ZR2-001-79  | 1  | ZR2-001-110 | 1  | ZR2-001-140 | 2  | ZR2-001-171 | 1  | ZR3-005-15                                      | 2  |
| ZR2-001-11 | 1  | ZR2-001-43 | 1  | ZR2-001-80  | 1  | ZR2-001-111 | 2  | ZR2-001-141 | 1  | ZR3-003-1   | 1  | ZR3-005-16                                      | 2  |
| ZR2-001-12 | 1  | ZR2-001-44 | 1  | ZR2-001-81  | 1  | ZR2-001-112 | 1  | ZR2-001-142 | 1  | ZR3-003-2   | 1  | ZR3-009-1                                       | 1  |
| ZR2-001-13 | 2  | ZR2-001-45 | 1  | ZR2-001-82  | 0  | ZR2-001-113 | 2  | ZR2-001-143 | 1  | ZR3-003-3   | 1  | ZR3-009-2                                       | 1  |
| ZR2-001-14 | 2  | ZR2-001-47 | 2  | ZR2-001-83  | 0  | ZR2-001-114 | 2  | ZR2-001-144 | 2  | ZR3-003-4   | 2  | ZR3-009-3                                       | 1  |
| ZR2-001-15 | 1  | ZR2-001-48 | 2  | ZR2-001-84  | 1  | ZR2-001-115 | 2  | ZR2-001-145 | 1  | ZR3-003-6   | 1  | ZR3-009-4                                       | 1  |
| ZR2-001-16 | 2  | ZR2-001-49 | 1  | ZR2-001-85  | 1  | ZR2-001-116 | 1  | ZR2-001-146 | 1  | ZR3-003-7   | 1  | ZR3-009-5                                       | 1  |
| ZR2-001-17 | 1  | ZR2-001-51 | 2  | ZR2-001-86  | 1  | ZR2-001-117 | 1  | ZR2-001-147 | 1  | ZR3-003-8   | 1  | ZR3-009-6                                       | 2  |
| ZR2-001-18 | 2  | ZR2-001-53 | 2  | ZR2-001-87  | 0  | ZR2-001-118 | 2  | ZR2-001-148 | 1  | ZR3-003-9   | 1  | ZR3-009-7                                       | 1  |
| ZR2-001-19 | 2  | ZR2-001-54 | 1  | ZR2-001-88  | 0  | ZR2-001-119 | 1  | ZR2-001-149 | 1  | ZR3-003-10  | 1  | ZR3-009-8                                       | 1  |
| ZR2-001-20 | 1  | ZR2-001-55 | 1  | ZR2-001-89  | 0  | ZR2-001-120 | 1  | ZR2-001-150 | 1  | ZR3-003-11  | 2  | ZR3-009-9                                       | 1  |
| ZR2-001-21 | 2  | ZR2-001-56 | 1  | ZR2-001-90  | 1  | ZR2-001-121 | 2  | ZR2-001-151 | 1  | ZR3-003-12  | 1  | ZR3-009-10                                      | 1  |
| ZR2-001-22 | 2  | ZR2-001-57 | 1  | ZR2-001-91  | 1  | ZR2-001-122 | 1  | ZR2-001-152 | 2  | ZR3-003-13  | 1  | ZR3-009-11                                      | 1  |
| ZR2-001-23 | 1  | ZR2-001-58 | 2  | ZR2-001-92  | 1  | ZR2-001-123 | 2  | ZR2-001-153 | 1  | ZR3-003-14  | 1  | ZR3-009-12                                      | 1  |
| ZR2-001-24 | 1  | ZR2-001-59 | 1  | ZR2-001-93  | 1  | ZR2-001-124 | 1  | ZR2-001-154 | 1  | ZR3-003-15  | 1  | ZR3-009-13                                      | 1  |
| ZR2-001-25 | 2  | ZR2-001-60 | 1  | ZR2-001-94  | 0  | ZR2-001-125 | 1  | ZR2-001-155 | 2  | ZR3-003-16  | 2  | ZR3-009-14                                      | 2  |
| ZR2-001-26 | 1  | ZR2-001-62 | 1  | ZR2-001-95  | 0  | ZR2-001-126 | 2  | ZR2-001-156 | 1  | ZR3-005-1   | 1  | ZR3-009-15                                      | 2  |
| ZR2-001-27 | 2  | ZR2-001-63 | 1  | ZR2-001-97  | 1  | ZR2-001-127 | 2  | ZR2-001-157 | 2  | ZR3-005-2   | 1  | ZR3-009-16                                      | 1  |
| ZR2-001-28 | 2  | ZR2-001-64 | 1  | ZR2-001-98  | 1  | ZR2-001-128 | 2  | ZR2-001-158 | 2  | ZR3-005-3   | 2  |                                                 |    |
| ZR2-001-30 | 1  | ZR2-001-65 | 1  | ZR2-001-99  | 1  | ZR2-001-129 | 1  | ZR2-001-159 | 2  | ZR3-005-4   | 2  | PT: phenotype<br>1: regrowth<br>2: non-regrowth |    |
| ZR2-001-31 | 1  | ZR2-001-67 | 2  | ZR2-001-100 | 1  | ZR2-001-130 | 2  | ZR2-001-160 | 1  | ZR3-005-5   | 1  |                                                 |    |
| ZR20-01-32 | 1  | ZR2-001-68 | 2  | ZR2-001-101 | 1  | ZR2-001-131 | 2  | ZR2-001-161 | 1  | ZR3-005-6   | 1  |                                                 |    |

**Table 3.** Results of the  $\chi^2$  goodness-of-fit tests of three simple genetic models

| Generations            | Observed |    |    | No. dominant genes (the expected R to NR ratio) and $P(\chi^2)^*$ |               |           |
|------------------------|----------|----|----|-------------------------------------------------------------------|---------------|-----------|
|                        | Total    | R  | NR | 1 (3:1)                                                           | 2 (9:7)       | 3 (27:37) |
| B73-Zd F <sub>2</sub>  | 134      | 81 | 53 | 0.0001                                                            | <b>0.2964</b> | 0.0001    |
| B73-Zd F <sub>3</sub>  | 72       | 52 | 20 | <b>0.5862</b>                                                     | 0.0063        | 0.0001    |
| Zd-RF F <sub>2</sub>   | 160      | 92 | 68 | 0.0001                                                            | <b>0.7499</b> | 0.0001    |
| Zd-RF F <sub>3-3</sub> | 15       | 12 | 3  | <b>0.6547</b>                                                     | 0.0639        | 0.3000    |
| Zd-RF F <sub>3-5</sub> | 16       | 9  | 7  | 0.0833                                                            | <b>1.0000</b> | 0.2547    |
| Zd-RF F <sub>3-9</sub> | 16       | 13 | 3  | <b>0.5637</b>                                                     | 0.0438        | 0.0016    |

\*: the best fit models are in bold.

**Table 4.** Numbers of SNPs revealed in each chromosome of the B73-ZD F2 population after each filtering step

| <b>Chr</b>   | <b>Raw SNP number</b> | <b>1<sup>st</sup> filter</b> | <b>2<sup>nd</sup> filter</b> | <b>3<sup>rd</sup> filter</b> | <b>4<sup>th</sup> filter</b> |
|--------------|-----------------------|------------------------------|------------------------------|------------------------------|------------------------------|
| <b>1</b>     | 109,543               | 5,751                        | 1,628                        | 82                           | 51                           |
| <b>2</b>     | 85,283                | 4,966                        | 1,476                        | 120                          | 77                           |
| <b>3</b>     | 81,625                | 4,708                        | 1,200                        | 120                          | 75                           |
| <b>4</b>     | 75,832                | 3,376                        | 942                          | 112                          | 82                           |
| <b>5</b>     | 77,314                | 4,409                        | 1,197                        | 198                          | 111                          |
| <b>6</b>     | 58,195                | 2,938                        | 761                          | 87                           | 49                           |
| <b>7</b>     | 62,280                | 3,108                        | 877                          | 144                          | 98                           |
| <b>8</b>     | 57,748                | 3,210                        | 877                          | 20                           | 16                           |
| <b>9</b>     | 57,231                | 2,982                        | 741                          | 29                           | 16                           |
| <b>10</b>    | 49,107                | 2,477                        | 732                          | 34                           | 22                           |
| <b>Total</b> | <b>714,158</b>        | <b>37,925</b>                | <b>10,431</b>                | <b>946</b>                   | <b>597</b>                   |

**Table 5.** PCR primers used in this study

| Primers  | Sequences                     |
|----------|-------------------------------|
| tb1MF    | 5' -AGTAGGCCATAGTACGTAC-3'    |
| tb1MR    | 5' -CTCTTTACCGAGCCCCTACA-3'   |
| tb1ZF    | 5' -ACTCAACGGCAGCAGCTACCTA-3' |
| tb1ZR    | 5' -CGTGTGTGTGATCGAATGGT-3'   |
| galcF:   | 5' -AATAAAATAGAGGAACGTCA-3'   |
| galcR:   | 5' -TGCTGCAAAGGATTACTGAT-3'   |
| mmc0381F | 5' -GTGGCCCTGTTGATGAG-3'      |
| mmc0381R | 5' -CGACGAGTACCAGGCAT-3'      |
| gt1-ZF:  | 5' -TCGCCTACATGACCGAGTAC-3'   |
| gt1-ZR:  | 5' -ATACTCTCAGCTGCTACGCG-3'   |
| gt1-MF:  | 5' -GAGACCGAGCTGCTGAAGAT-3'   |
| gt1-MR:  | 5' -TGTAGCTGTTGTAGGCGTACT-3'  |

**Supplementary Table S1.** Segeagation of regrowth among the B73-Zd F3s

| <b>Plant</b> | <b>PT</b> | <b>Plant</b> | <b>PT</b> | <b>Plant</b> | <b>PT</b> | <b>Plant</b> | <b>PT</b> |
|--------------|-----------|--------------|-----------|--------------|-----------|--------------|-----------|
| BZ3-010-1-1  | 1         | BZ3-010-1-20 | 2         | BZ3-010-1-46 | 2         | BZ3-010-1-69 | 1         |
| BZ3-010-1-2  | 1         | BZ3-010-1-22 | 1         | BZ3-010-1-47 | 1         | BZ3-010-1-70 | 1         |
| BZ3-010-1-3  | 1         | BZ3-010-1-23 | 1         | BZ3-010-1-48 | 1         | BZ3-010-1-71 | 1         |
| BZ3-010-1-4  | 1         | BZ3-010-1-24 | 1         | BZ3-010-1-50 | 1         | BZ3-010-1-72 | 1         |
| BZ3-010-1-5  | 1         | BZ3-010-1-25 | 1         | BZ3-010-1-51 | 2         | BZ3-010-1-73 | 1         |
| BZ3-010-1-6  | 1         | BZ3-010-1-26 | 1         | BZ3-010-1-52 | 1         | BZ3-010-1-74 | 1         |
| BZ3-010-1-7  | 1         | BZ3-010-1-27 | 1         | BZ3-010-1-53 | 1         | BZ3-010-1-75 | 1         |
| BZ3-010-1-8  | 2         | BZ3-010-1-30 | 1         | BZ3-010-1-54 | 1         | BZ3-010-1-76 | 2         |
| BZ3-010-1-9  | 2         | BZ3-010-1-31 | 1         | BZ3-010-1-56 | 1         | BZ3-010-1-77 | 2         |
| BZ3-010-1-11 | 2         | BZ3-010-1-32 | 1         | BZ3-010-1-57 | 1         | BZ3-010-1-78 | 1         |
| BZ3-010-1-12 | 1         | BZ3-010-1-33 | 2         | BZ3-010-1-68 | 2         | BZ3-010-1-79 | 1         |
| BZ3-010-1-13 | 2         | BZ3-010-1-34 | 1         | BZ3-010-1-59 | 1         | BZ3-010-1-80 | 1         |
| BZ3-010-1-14 | 2         | BZ3-010-1-35 | 1         | BZ3-010-1-61 | 2         | BZ3-010-1-81 | 2         |
| BZ3-010-1-15 | 1         | BZ3-010-1-38 | 2         | BZ3-010-1-62 | 1         | BZ3-010-1-82 | 2         |
| BZ3-010-1-16 | 1         | BZ3-010-1-39 | 1         | BZ3-010-1-63 | 1         | BZ3-010-1-83 | 2         |
| BZ3-010-1-17 | 1         | BZ3-010-1-40 | 1         | BZ3-010-1-64 | 2         | BZ3-010-1-84 | 1         |
| BZ3-010-1-18 | 1         | BZ3-010-1-41 | 2         | BZ3-010-1-67 | 1         | BZ3-010-1-85 | 1         |
| BZ3-010-1-19 | 1         | BZ3-010-1-42 | 2         | BZ3-010-1-68 | 1         | BZ3-010-1-87 | 1         |

1: regrowth; 2: non-regrowth

**Supplementary Table S2.** Phenotypes and the *gt1*, *id1* and *tb1* haplotypes of 26 F2 plants and three F3 populations of the *Zea mays* cv Rhee Flint x *Z. diploperennis* cross\*.

| Line                | PT | <i>tb1</i> | <i>id1</i> | <i>gt1</i> | Line                 | PT | <i>tb1</i> | <i>id1</i> | <i>gt1</i> | Line                 | PT | <i>tb1</i> | <i>id1</i> | <i>gt1</i> |
|---------------------|----|------------|------------|------------|----------------------|----|------------|------------|------------|----------------------|----|------------|------------|------------|
| F <sub>2</sub> -1   | 1  | 3          | 1          | 3          | F <sub>3</sub> -3-2  | 1  | 1          | 2          | 1          | F <sub>3</sub> -5-13 | 1  | 1          | 2          | 1          |
| F <sub>2</sub> -2   | 2  | 2          | 2          | 2          | F <sub>3</sub> -3-3  | 1  | 1          | 2          | 1          | F <sub>3</sub> -5-14 | 2  | 1          | 2          | 1          |
| F <sub>2</sub> -3   | 1  | 1          | 2          | 3          | F <sub>3</sub> -3-4  | 2  | 1          | 2          | 3          | F <sub>3</sub> -5-15 | 2  | 1          | 2          | 1          |
| F <sub>2</sub> -4   | 2  | 2          | 2          | 2          | F <sub>3</sub> -3-6  | 1  | 1          | 2          | 3          | F <sub>3</sub> -5-16 | 2  | 1          | 2          | 1          |
| F <sub>2</sub> -5   | 1  | 1          | 2          | 1          | F <sub>3</sub> -3-7  | 1  | 1          | 2          | 1          | F <sub>3</sub> -9-1  | 1  | 1          | 2          | 1          |
| F <sub>2</sub> -6   | 1  | 3          | 1          | 1          | F <sub>3</sub> -3-8  | 1  | 1          | 2          | 3          | F <sub>3</sub> -9-2  | 1  | 1          | 2          | 2          |
| F <sub>2</sub> -7   | 2  | 2          | 2          | 2          | F <sub>3</sub> -3-9  | 1  | 1          | 2          | 3          | F <sub>3</sub> -9-3  | 1  | 1          | 2          | 2          |
| F <sub>2</sub> -9   | 1  | 1          | 2          | 3          | F <sub>3</sub> -3-10 | 1  | 1          | 2          | 3          | F <sub>3</sub> -9-4  | 1  | 1          | 2          | 3          |
| F <sub>2</sub> -10  | 2  | 3          | 1          | 3          | F <sub>3</sub> -3-11 | 2  | 1          | 2          | 3          | F <sub>3</sub> -9-5  | 1  | 1          | 2          | 1          |
| F <sub>2</sub> -11  | 1  | 2          | 2          | 3          | F <sub>3</sub> -3-12 | 1  | 1          | 2          | 1          | F <sub>3</sub> -9-6  | 2  | 1          | 2          | 2          |
| F <sub>2</sub> -12  | 1  | 3          | 1          | 1          | F <sub>3</sub> -3-13 | 1  | 1          | 2          | 3          | F <sub>3</sub> -9-7  | 1  | 1          | 2          | 3          |
| F <sub>2</sub> -13  | 2  | 3          | 1          | 3          | F <sub>3</sub> -3-14 | 1  | 1          | 2          | 1          | F <sub>3</sub> -9-8  | 1  | 1          | 2          | 1          |
| F <sub>2</sub> -14  | 2  | 2          | 2          | 3          | F <sub>3</sub> -3-15 | 1  | 1          | 2          | 1          | F <sub>3</sub> -9-9  | 1  | 1          | 2          | 3          |
| F <sub>2</sub> -15  | 1  | 3          | 1          | 1          | F <sub>3</sub> -3-16 | 2  | 1          | 2          | 2          | F <sub>3</sub> -9-10 | 1  | 1          | 2          | 3          |
| F <sub>2</sub> -16  | 2  | 2          | 2          | 1          | F <sub>3</sub> -5-1  | 1  | 1          | 2          | 1          | F <sub>3</sub> -9-11 | 1  | 1          | 2          | 1          |
| F <sub>2</sub> -17  | 1  | 3          | 1          | 3          | F <sub>3</sub> -5-2  | 1  | 1          | 2          | 1          | F <sub>3</sub> -9-12 | 1  | 1          | 2          | 3          |
| F <sub>2</sub> -18  | 2  | 3          | 1          | 2          | F <sub>3</sub> -5-3  | 2  | 1          | 2          | 1          | F <sub>3</sub> -9-13 | 1  | 1          | 2          | 1          |
| F <sub>2</sub> -19  | 2  | 3          | 1          | 2          | F <sub>3</sub> -5-4  | 2  | 1          | 2          | 1          | F <sub>3</sub> -9-14 | 2  | 1          | 2          | 3          |
| F <sub>2</sub> -20  | 1  | 3          | 1          | 3          | F <sub>3</sub> -5-5  | 1  | 1          | 2          | 1          | F <sub>3</sub> -9-15 | 2  | 1          | 2          | 3          |
| F <sub>2</sub> -21  | 2  | 2          | 2          | 3          | F <sub>3</sub> -5-6  | 1  | 1          | 2          | 1          | F <sub>3</sub> -9-16 | 1  | 1          | 2          | 1          |
| F <sub>2</sub> -22  | 2  | 2          | 2          | 3          | F <sub>3</sub> -5-7  | 1  | 1          | 2          | 1          | F <sub>3</sub> -12-1 | 1  | 1          | 2          | 1          |
| F <sub>2</sub> -23  | 1  | 2          | 2          | 3          | F <sub>3</sub> -5-8  | 1  | 1          | 2          | 1          | F <sub>3</sub> -12-2 | 1  | 1          | 2          | 1          |
| F <sub>2</sub> -24  | 1  | 1          | 2          | 3          | F <sub>3</sub> -5-9  | 1  | 1          | 2          | 1          | F <sub>3</sub> -12-3 | 1  | 1          | 2          | 1          |
| F <sub>2</sub> -25  | 1  | 2          | 1          | 1          | F <sub>3</sub> -5-10 | 1  | 1          | 2          | 1          | F <sub>3</sub> -12-4 | 1  | 3          | 1          | 1          |
| F <sub>2</sub> -26  | 1  | 3          | 2          | 1          | F <sub>3</sub> -5-11 | 2  | 1          | 2          | 1          | F <sub>3</sub> -12-5 | 1  | 3          | 1          | 1          |
| F <sub>3</sub> -3-1 | 1  | 1          | 2          | 3          | F <sub>3</sub> -5-12 | 2  | 1          | 2          | 1          |                      |    |            |            |            |

\* For phenotype (PT), "1" is for regrowth and "2" is for non-regrowth; for genotypes, "1" is homozygous for the *Zea diploperennis* allele, "2" is homozygous for the *Z. mays*'s allele and "3" is for heterozygous.

**Supplementary Table S3.** Steps and codes in TASSEL pipeline including example command lines and brief descriptions. Parameters are highlighted and described when first be used.

| <b>FastqToTagCountPlugin</b>       |              |                                                                                                                                                                                                                                                                        |                                                                                                                                                                                      |
|------------------------------------|--------------|------------------------------------------------------------------------------------------------------------------------------------------------------------------------------------------------------------------------------------------------------------------------|--------------------------------------------------------------------------------------------------------------------------------------------------------------------------------------|
| Step 1                             | Description  | Derives a tagCount list for each FASTQ file. Keeps only good reads having a barcode and a cut site and no N's in the useful part of the sequence. Trims off the barcodes and truncates sequences that (1) have a second cut site, or (2) read into the common adapter. |                                                                                                                                                                                      |
|                                    | Code         | <code>/home/tassel/run_pipeline.pl -fork1 -Xms8G -Xmx16G -FastqToTagCountPlugin -i fastq -k key.txt -e ApeKI -o tagcounts -endPlugin -runfork1</code>                                                                                                                  |                                                                                                                                                                                      |
|                                    | Parameters   | -Xms8G, -Xmx16G Set minimum and maximum usage of RAM.                                                                                                                                                                                                                  |                                                                                                                                                                                      |
| <b>MergeMultipleTagCountPlugin</b> |              |                                                                                                                                                                                                                                                                        |                                                                                                                                                                                      |
| Step 2                             | Description  | Merges each tagCount file into a single “master” tagCount list.                                                                                                                                                                                                        |                                                                                                                                                                                      |
|                                    | Code         | <code>/home/tassel/run_pipeline.pl -Xms8G -Xmx16G -fork1 -MergeMultipleTagCountPlugin -i tagcounts -o mergedtagcounts/BCA965ANXX_4.cnt -c 5 -endPlugin -runfork1</code>                                                                                                |                                                                                                                                                                                      |
|                                    | Parameters   | -c 5 Minimum number of times a tag must be present to be output, typically between 5 and 20. The lower value is, the more sequencing errors will be included analysis. Default: 1                                                                                      |                                                                                                                                                                                      |
|                                    | Note:        | Sequencing errors can be tolerated and will be removed by following steps.                                                                                                                                                                                             |                                                                                                                                                                                      |
| <b>TagCountToFastqPlugin</b>       |              |                                                                                                                                                                                                                                                                        |                                                                                                                                                                                      |
| Step 3                             | Description: | Converts a master tagCount file containing all the tags of interest from binary (.cnt) format into a FASTQ format file (.fq) that can then be used as input to bowtie2.                                                                                                |                                                                                                                                                                                      |
|                                    | Code         | <code>/home/tassel/run_pipeline.pl -Xms8G -Xmx16G -fork1 -TagCountToFastqPlugin -i mergedtagcounts/BCA965ANXX_4.cnt -o BCA965ANXX_4.fq -c 5 -endPlugin -runfork1</code>                                                                                                |                                                                                                                                                                                      |
| <b>Bowtie2 Index</b>               |              |                                                                                                                                                                                                                                                                        |                                                                                                                                                                                      |
| Step 4                             | Description  | Creates a series of support files needed to operate bowtie2.                                                                                                                                                                                                           |                                                                                                                                                                                      |
|                                    | Code         | <code>bowtie2-build chr1.fa,chr2.fa,chr3.fa,chr4.fa,chr5.fa,chr6.fa,chr7.fa,chr8.fa,chr9.fa,chr10.fa /home/gbs/b73ref/b73_ref.fa</code>                                                                                                                                |                                                                                                                                                                                      |
|                                    | Notes        | Chromosome 1 to 10 from B73_Ref_V4 genome are used to create index files.                                                                                                                                                                                              |                                                                                                                                                                                      |
| <b>Alignment with bowtie2</b>      |              |                                                                                                                                                                                                                                                                        |                                                                                                                                                                                      |
| Step 5                             | Description  | Aligns the master set of GBS tags to the reference genome.                                                                                                                                                                                                             |                                                                                                                                                                                      |
|                                    | Code         | <code>bowtie2 -p 8 -N 0 -L 20 -i S,1,0.50 -D 20 -R 3 -x /home/b73ref/b73_ref.fa -U /home/gbs/analysis/BCA965ANXX_4.fq -S /home/gbs/analysis/BCA965ANXX_4.sam</code>                                                                                                    |                                                                                                                                                                                      |
|                                    | Parameters   | -p 8                                                                                                                                                                                                                                                                   | The number of processors to be used.                                                                                                                                                 |
|                                    |              | -N 0                                                                                                                                                                                                                                                                   | The number of mismatches to allowed in a seed alignment during multiseed alignment. Can be set to 0 or 1. Higher value makes alignment slower but increases sensitivity. Default: 0. |
|                                    |              | -L 20                                                                                                                                                                                                                                                                  | The length of the seed substrings to align during multiseed alignment. Smaller values make alignment slower but more sensitive. Default: 20.                                         |
| -I S, 1, 0.50                      |              | Sets a function governing the interval between seed substrings to use during multiseed alignment. Decide the seed frame length and interval which can influence the accuracy of alignment.                                                                             |                                                                                                                                                                                      |



|           |                                                                                                                                                                                                                                                            |                                                                                                                                                                                                                                                                                   |                                                                                                                                                           |
|-----------|------------------------------------------------------------------------------------------------------------------------------------------------------------------------------------------------------------------------------------------------------------|-----------------------------------------------------------------------------------------------------------------------------------------------------------------------------------------------------------------------------------------------------------------------------------|-----------------------------------------------------------------------------------------------------------------------------------------------------------|
|           |                                                                                                                                                                                                                                                            | -D 20                                                                                                                                                                                                                                                                             | The times that consecutive seed extension attempts can "fail" before Bowtie 2 moves on. Default: 15.                                                      |
|           |                                                                                                                                                                                                                                                            | -R 3                                                                                                                                                                                                                                                                              | the maximum number of times Bowtie 2 will "re-seed" reads with repetitive seeds. Default: 2.                                                              |
|           | Note                                                                                                                                                                                                                                                       | Arguments and values used here are identical to <code>-very-sensitive-local</code> .                                                                                                                                                                                              |                                                                                                                                                           |
| Step 6    | <b>SAMConverterPlugin</b>                                                                                                                                                                                                                                  |                                                                                                                                                                                                                                                                                   |                                                                                                                                                           |
|           | Description                                                                                                                                                                                                                                                | Converts a SAM format alignment (.sam) file produced by bowtie2 into a binary tagsOnPhysicalMap (.topm) file that can be used by the TagsToSNPByAlignmentPlugin for calling SNPs.                                                                                                 |                                                                                                                                                           |
|           | Code                                                                                                                                                                                                                                                       | <code>/home/tassel/run_pipeline.pl -Xms8G -Xmx16G -fork1 -SAMConverterPlugin -i BCA965ANXX_4.sam -o topm/BCA965ANXX_4.topm -endPlugin -runfork1</code>                                                                                                                            |                                                                                                                                                           |
| Step 7    | <b>FastqToTBTPlugin</b>                                                                                                                                                                                                                                    |                                                                                                                                                                                                                                                                                   |                                                                                                                                                           |
|           | Description                                                                                                                                                                                                                                                | Generates a TagsByTaxa file to parse FASTQ files containing raw GBS sequence data for good reads                                                                                                                                                                                  |                                                                                                                                                           |
|           | Code                                                                                                                                                                                                                                                       | <code>/home/tassel/run_pipeline.pl -Xms8G -Xmx16G -fork1 -FastqToTBTPlugin -i fastq -k key.txt -e ApeKI -o tbt -y -t mergedtagcounts/BCA965ANXX_4.cnt -endPlugin -runfork1</code>                                                                                                 |                                                                                                                                                           |
|           | Parameters                                                                                                                                                                                                                                                 | -y                                                                                                                                                                                                                                                                                | Output in TBTByte format (counts from 0-127) instead of TBTBit (0 or 1).                                                                                  |
| Step 8    | <b>MergeTagsByTaxaFilesPlugin</b>                                                                                                                                                                                                                          |                                                                                                                                                                                                                                                                                   |                                                                                                                                                           |
|           | Description                                                                                                                                                                                                                                                | Merges all .tbt.bin and/or (preferably) .tbt.byte files present in the input directory.                                                                                                                                                                                           |                                                                                                                                                           |
|           | Code                                                                                                                                                                                                                                                       | <code>/home/tassel/run_pipeline.pl -Xms8G -Xmx16G -fork1 -MergeTagsByTaxaFilesPlugin -i tbt -o mergedtbt/BCA965ANXX_4.tbt.byte -endPlugin -runfork1</code>                                                                                                                        |                                                                                                                                                           |
| Step 9    | <b>TagsToSNPByAlignmentPlugin</b>                                                                                                                                                                                                                          |                                                                                                                                                                                                                                                                                   |                                                                                                                                                           |
|           | Description                                                                                                                                                                                                                                                | Aligns tags from the same physical location against one another, calls SNPs from each alignment, and then outputs the SNP genotypes to a HapMap format file (one file per chromosome).                                                                                            |                                                                                                                                                           |
|           | Code                                                                                                                                                                                                                                                       | <code>/home/tassel/run_pipeline.pl -Xms8G -Xmx16G -fork1 -TagsToSNPByAlignmentPlugin -i mergedtbt/BCA965ANXX_4.tbt.byte -y -m topm/BCA965ANXX_4.topm -o hapmap/raw/BCA965ANXX_4_chr+.hmp.txt -mnF "-0.1" -ref /home/b73ref/b73_chr.fastq -sC 1 -eC 10 -endPlugin -runfork1</code> |                                                                                                                                                           |
|           | Parameters                                                                                                                                                                                                                                                 | -mnF "-0.1"                                                                                                                                                                                                                                                                       | Minimum value of F. Samples that are not inbred line should invoke this to be negative value.                                                             |
|           |                                                                                                                                                                                                                                                            | -sC 1                                                                                                                                                                                                                                                                             | Start chromosome.                                                                                                                                         |
|           |                                                                                                                                                                                                                                                            | -eC 10                                                                                                                                                                                                                                                                            | End chromosome.                                                                                                                                           |
| Note      | This command is only available in TASSEL 3. The DiscoverySNPCaller in TASSEL 5 replaces this command and remains the same SNP calling functions but generate a db file rather than hapmap file. Except listed parameters, all others were used as default. |                                                                                                                                                                                                                                                                                   |                                                                                                                                                           |
| Step 10   | <b>MergeDuplicateSNPsPlugin</b>                                                                                                                                                                                                                            |                                                                                                                                                                                                                                                                                   |                                                                                                                                                           |
|           | Description                                                                                                                                                                                                                                                | Finds duplicate SNPs in the input HapMap file, and merges them if they have the same pair of alleles                                                                                                                                                                              |                                                                                                                                                           |
|           | Code                                                                                                                                                                                                                                                       | <code>/home/tassel/run_pipeline.pl -Xms8G -Xmx16G -fork1 -MergeDuplicateSNPsPlugin -hmp hapmap/raw/BCA965ANXX_4_chr+.hmp.txt -o hapmap/mergedSNPs/BCA965ANXX_4_chr+.hmp.txt -misMat 0.1 -callHets -sC 1 -eC 10 -endPlugin -runfork1</code>                                        |                                                                                                                                                           |
|           | Parameters                                                                                                                                                                                                                                                 | -misMat 0.1                                                                                                                                                                                                                                                                       | Threshold genotypic mismatch rate above which the duplicate SNPs won't be merged. Default: 0.05. For lines not fully inbred, value of 0.1 is recommended. |
| -callHets |                                                                                                                                                                                                                                                            | When two genotypes at a replicate SNP disagree for a taxon, call it a heterozygote. If the germplasm is not fully                                                                                                                                                                 |                                                                                                                                                           |

|             |                               |                                                                                                                                                                                                                                                                                          |                                                                                            |  |
|-------------|-------------------------------|------------------------------------------------------------------------------------------------------------------------------------------------------------------------------------------------------------------------------------------------------------------------------------------|--------------------------------------------------------------------------------------------|--|
|             |                               |                                                                                                                                                                                                                                                                                          | inbred and contains residual heterozygosity, then -callHets should be on.                  |  |
|             | Note                          | The -callHets parameter is to guarantee heterozygotes can be correctly output, rather than omitted as errors.                                                                                                                                                                            |                                                                                            |  |
| Step 11     | <b>GBSHapMapFiltersPlugin</b> |                                                                                                                                                                                                                                                                                          |                                                                                            |  |
|             | Description:                  | Filtering SNPs with specific requirements.                                                                                                                                                                                                                                               |                                                                                            |  |
|             | Code:                         | <pre>/home/tassel4/run_pipeline.pl -Xms10G -Xmx16G -fork1 - GBSHapMapFiltersPlugin -hmp hapmap/mergedSNPs/BCA965ANXX_4 _chr+.hmp.txt -o hapmap/filt/BCA965ANXX_4_chr+.hmp.txt -mnTCov 0.01 -mnSCov 0.2 -mnMAF 0.01 -hLD -mnR2 0.2 -mnBonP 0.005 -sC 1 - eC 10 -endPlugin -runfork1</pre> |                                                                                            |  |
|             | Parameters:                   | -mnTCov 0.01                                                                                                                                                                                                                                                                             | Minimum taxon coverage. The minimum SNP call rate for a taxon to be included in the output |  |
|             |                               | -mnSCov 0.2                                                                                                                                                                                                                                                                              | Minimum site coverage. The minimum taxon call rate for a SNP to be included in the output  |  |
| -mnMAF 0.01 |                               | Minimum minor allele frequency                                                                                                                                                                                                                                                           |                                                                                            |  |
| -hLD True   |                               | filtered for those in statistically significant LD with at least one neighboring SNP                                                                                                                                                                                                     |                                                                                            |  |

### Supplementary Table S4. R codes used for candidate locus/QTL analyses

```
library(qtl)
all <- read.cross("csv", file="SNP.csv", genotypes = c("AA","AB", "BB"),
na.strings = "NA", alleles = c("A", "B"))
all <- calc.genoprob(all, step=1.0, off.end = 0.0, error.prob = 1.0e-
4,map.function = "haldane",stepwidth = "fixed")
all <- sim.geno(all, n.draws=32, step=1.0, off.end = 0.0, error.prob = 1.0e-
4,map.function = "haldane",stepwidth = "fixed")
all.scan1 <- scanone(all, pheno.col=2, model="binary", method = "em")
all.scan1.perm <- scanone(all, pheno.col = 2, model = "binary", method="em",
n.perm = 1000)
plot(all.scan1,main="LOD plot of regrowth",ylim = c(0,6))
threshold <- summary(all.scan1.perm, alpha=c(0.1, 0.05, 0.01))
abline(h=threshold[1], lty="dashed", lwd=1, col="blue")
abline(h=threshold[2], lty="dashed", lwd=1, col="yellow")
abline(h=threshold[3], lty="dashed", lwd=1, col="red")
summary(all.scan1, perm=all.scan1.perm, lodcolumn=1, alpha=0.1)
mkname1 <- find.marker(all, chr=2, pos=24.244290)
mkname2 <- find.marker(all, chr=7, pos=5.060739)
effectplot(all,pheno.col=2,mname1= mkname1), ylim=c(0,1))
effectplot(all,pheno.col=2,mname1= mkname2), ylim=c(0,1))
write.csv(all.scan1, "all.scan1.csv",row.names = TRUE)
```

## Figures

Figure 1:

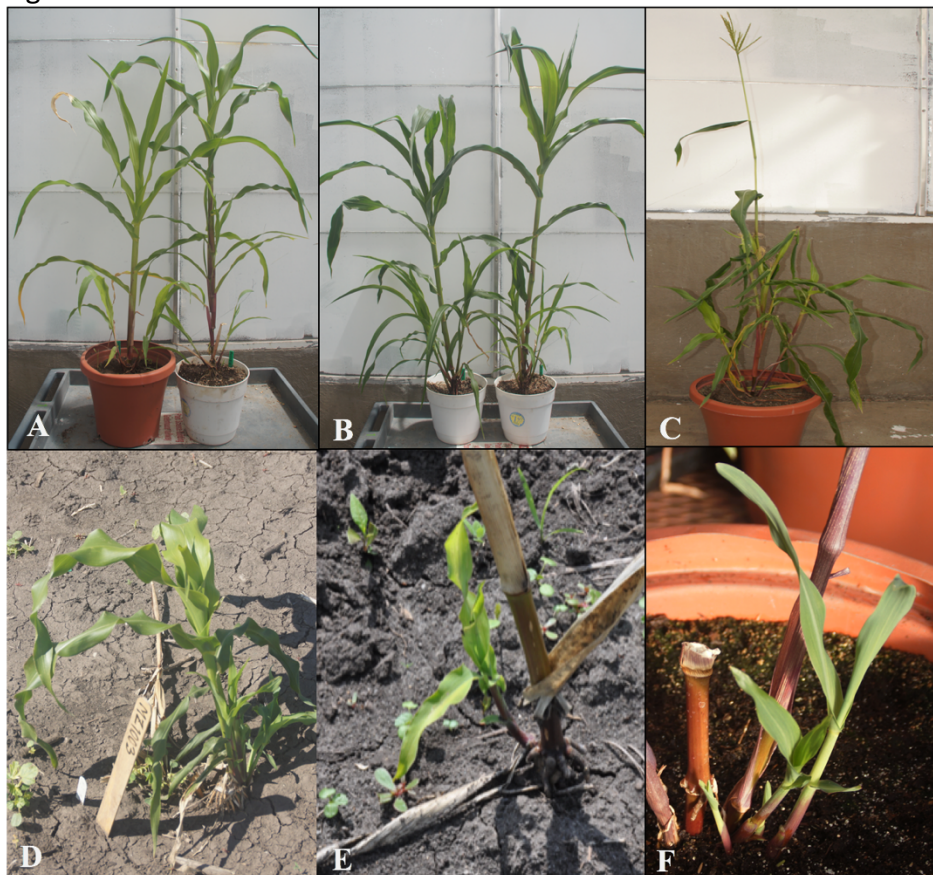

Figure 2:

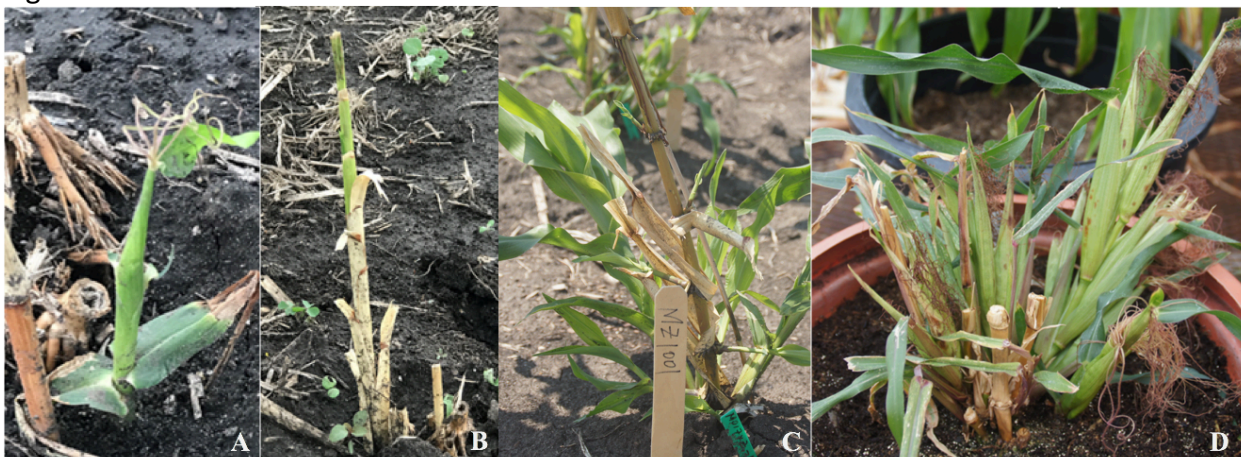

Figure 3:

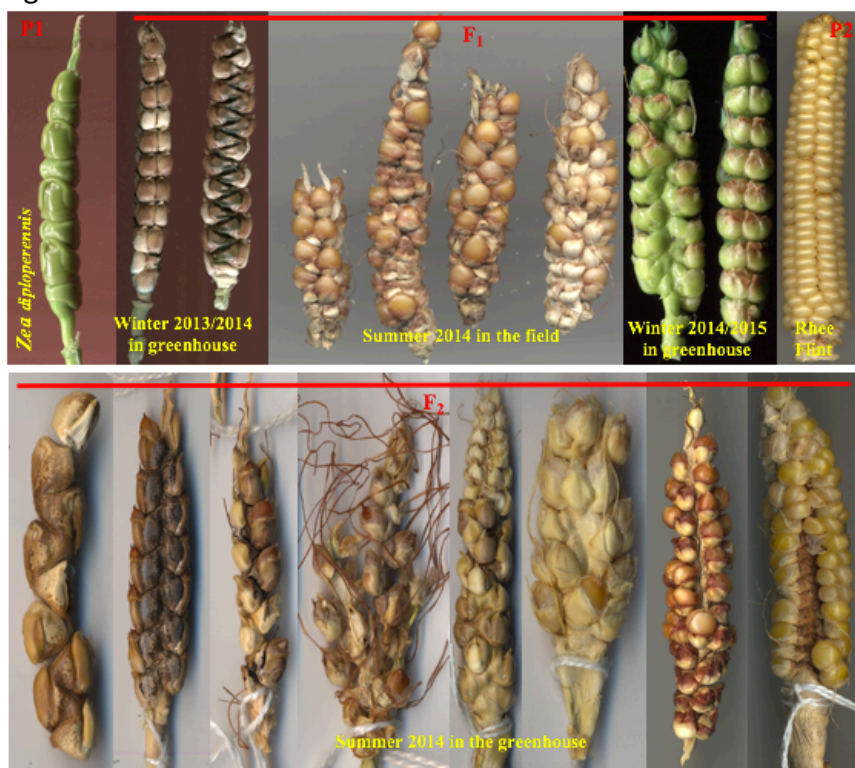

Figure 4:

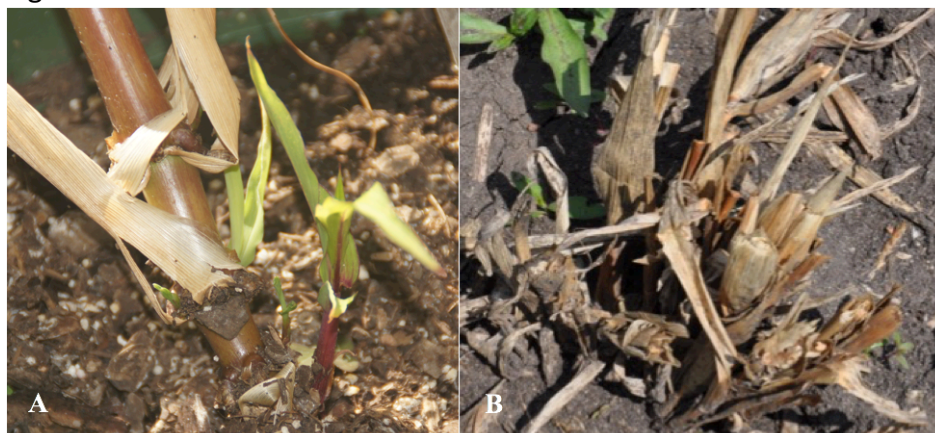

Figure 5:

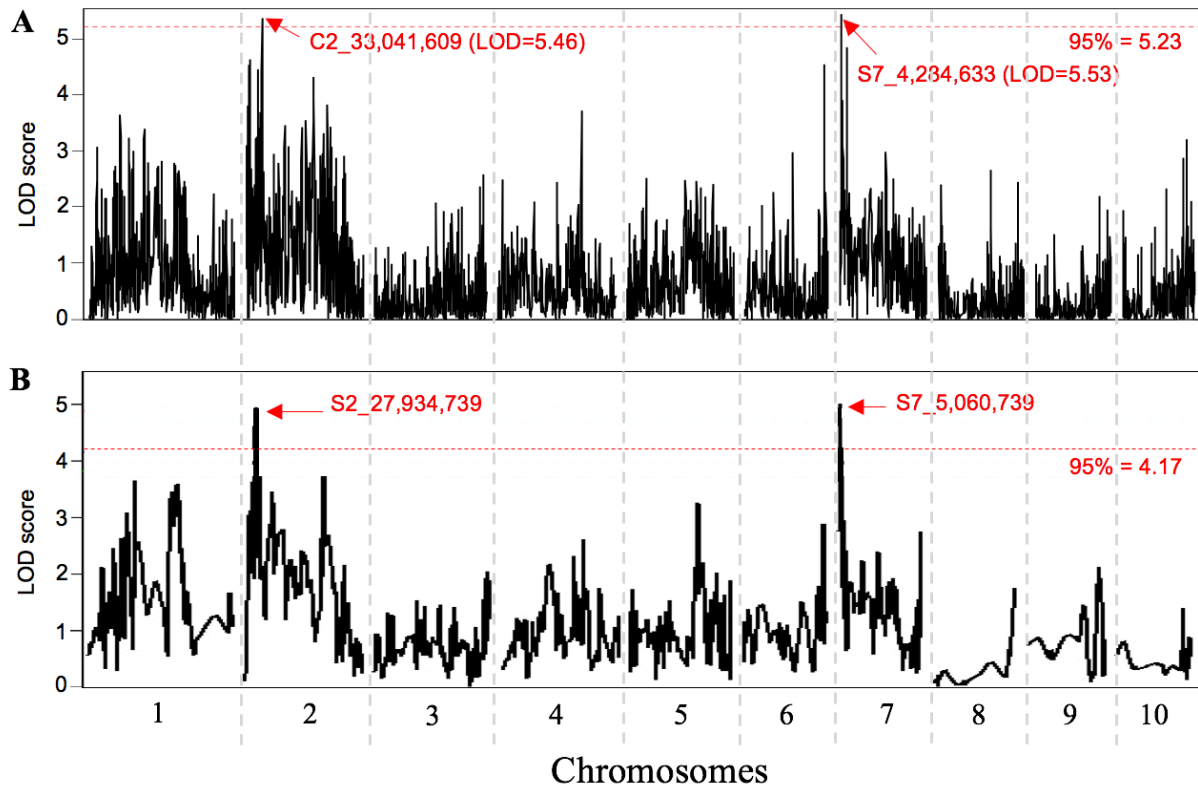

Figure 6:

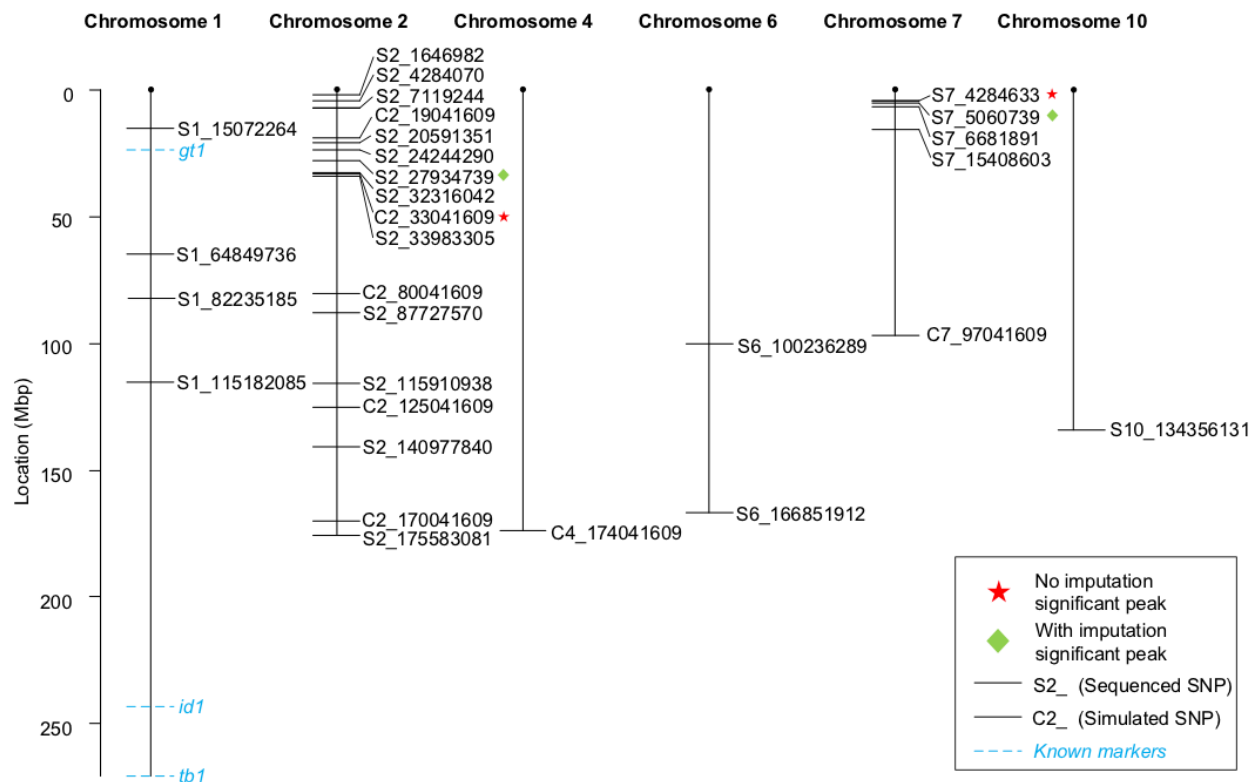

Figure S1:

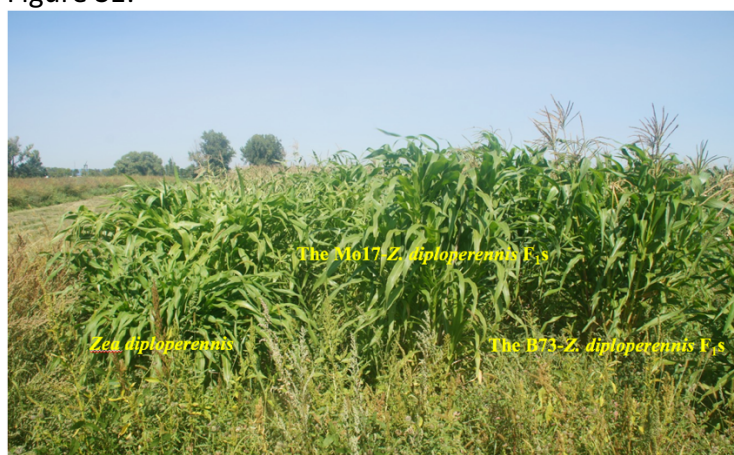

Figure S2:

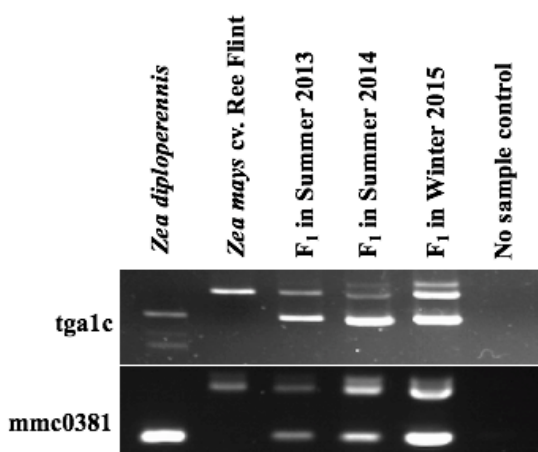

Figure S3:

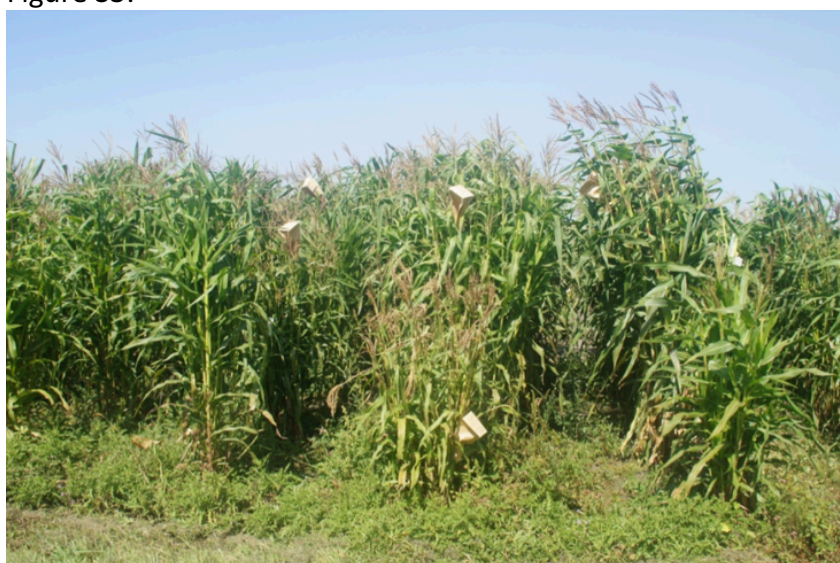

Source: https://www.biorxiv.org/content/10.1101/388256v2.full.pdf
